# Supplementary material for: PseudoFuN: Deriving functional potentials of pseudogenes from integrative relationships with genes and microRNAs across 32 cancers
Source: PubMed Central journal article supplement (PMC6486473; doi:10.1093/gigascience/giz046), 2019-04-26
Supplement: giz046_giga-d-18-00369_original_submission.pdf [file giz046_giga-d-18-00369_original_submission.pdf]

## PseudoFuN: Deriving functional potentials of pseudogenes from integrative relationships with genes and miRNAs across 32 cancers

--Manuscript Draft--

|                                                      |                                                                                                                                                                                                                                                                                                                                                                                                                                                                                                                                                                                                                                                                                                                                                                                                                                                                                                                                                                                                                                                                                                                                                                                                                                                                                                                                                                                                                                                                                                                                                                                                                                                                                                                                                                                                                                                                                                                                                                                                                                                                                                                                                                                                                                       |                    |
|------------------------------------------------------|---------------------------------------------------------------------------------------------------------------------------------------------------------------------------------------------------------------------------------------------------------------------------------------------------------------------------------------------------------------------------------------------------------------------------------------------------------------------------------------------------------------------------------------------------------------------------------------------------------------------------------------------------------------------------------------------------------------------------------------------------------------------------------------------------------------------------------------------------------------------------------------------------------------------------------------------------------------------------------------------------------------------------------------------------------------------------------------------------------------------------------------------------------------------------------------------------------------------------------------------------------------------------------------------------------------------------------------------------------------------------------------------------------------------------------------------------------------------------------------------------------------------------------------------------------------------------------------------------------------------------------------------------------------------------------------------------------------------------------------------------------------------------------------------------------------------------------------------------------------------------------------------------------------------------------------------------------------------------------------------------------------------------------------------------------------------------------------------------------------------------------------------------------------------------------------------------------------------------------------|--------------------|
| <b>Manuscript Number:</b>                            | GIGA-D-18-00369                                                                                                                                                                                                                                                                                                                                                                                                                                                                                                                                                                                                                                                                                                                                                                                                                                                                                                                                                                                                                                                                                                                                                                                                                                                                                                                                                                                                                                                                                                                                                                                                                                                                                                                                                                                                                                                                                                                                                                                                                                                                                                                                                                                                                       |                    |
| <b>Full Title:</b>                                   | PseudoFuN: Deriving functional potentials of pseudogenes from integrative relationships with genes and miRNAs across 32 cancers                                                                                                                                                                                                                                                                                                                                                                                                                                                                                                                                                                                                                                                                                                                                                                                                                                                                                                                                                                                                                                                                                                                                                                                                                                                                                                                                                                                                                                                                                                                                                                                                                                                                                                                                                                                                                                                                                                                                                                                                                                                                                                       |                    |
| <b>Article Type:</b>                                 | Technical Note                                                                                                                                                                                                                                                                                                                                                                                                                                                                                                                                                                                                                                                                                                                                                                                                                                                                                                                                                                                                                                                                                                                                                                                                                                                                                                                                                                                                                                                                                                                                                                                                                                                                                                                                                                                                                                                                                                                                                                                                                                                                                                                                                                                                                        |                    |
| <b>Funding Information:</b>                          | U.S. National Library of Medicine (US) (4T15LM011270-05)                                                                                                                                                                                                                                                                                                                                                                                                                                                                                                                                                                                                                                                                                                                                                                                                                                                                                                                                                                                                                                                                                                                                                                                                                                                                                                                                                                                                                                                                                                                                                                                                                                                                                                                                                                                                                                                                                                                                                                                                                                                                                                                                                                              | Mr. Travis Johnson |
|                                                      | Ohio State University (Startup Funds)                                                                                                                                                                                                                                                                                                                                                                                                                                                                                                                                                                                                                                                                                                                                                                                                                                                                                                                                                                                                                                                                                                                                                                                                                                                                                                                                                                                                                                                                                                                                                                                                                                                                                                                                                                                                                                                                                                                                                                                                                                                                                                                                                                                                 | Dr. Yan Zhang      |
| <b>Abstract:</b>                                     | <p>Background: Long thought “relics” of evolution, not until recently have pseudogenes been of medical interest regarding regulation in cancer. Often, these regulatory roles are a direct byproduct of their close sequence homology to protein coding genes. Novel pseudogene-gene functional associations can be identified through the integration of biomedical data, such as sequence homology, functional pathways, gene expression, pseudogene expression, and miRNA expression. However, not all of the information has been integrated, and the vast majority of previous pseudogene studies relied on 1:1 pseudogene-parent gene relationships without leveraging other homologous genes/pseudogenes. Results: We produce pseudogene-gene (PGG) families that expand beyond the current 1:1 paradigm. Firstly, we construct expansive PGG databases by i) CUDAlign GPU accelerated local alignment of all pseudogenes to gene families (totaling 1.6 billion individual local alignments and more than 40,000 GPU hours) and ii) BLAST-based assignment of pseudogenes to gene families. Secondly, we create an open-source web application (PseudoFuN) to search for integrative functional relationships of sequence homology, miRNA expression, gene expression, pseudogene expression, and gene ontology. We produce four “flavors” of databases (&gt;462,000,000 pseudogene-gene pairwise alignments and 133,770 PGG families) that can be queried and downloaded using PseudoFuN. These databases are consistent with previous 1:1 pseudogene-gene annotation and also are much more powerful including millions of de novo pseudogene-gene associations. We find multiple known (e.g., miR20a-PTEN-PTENP1) and novel (e.g., miR375-SOX15- PPP4R1L) miRNA-gene-pseudogene associations in prostate cancer. PseudoFuN provides a “one stop shop” for identifying and visualizing thousands of potential regulatory relationships related to pseudogenes in TCGA cancers. Conclusions: Thousands of new pseudogene-gene associations can be explored in the context of miRNA-gene-pseudogene coexpression and differential expression with a simple-to-use online tool by bioinformaticians and oncologists alike.</p> |                    |
| <b>Corresponding Author:</b>                         | Yan Zhang<br>Ohio State University<br>Columbus, Ohio UNITED STATES                                                                                                                                                                                                                                                                                                                                                                                                                                                                                                                                                                                                                                                                                                                                                                                                                                                                                                                                                                                                                                                                                                                                                                                                                                                                                                                                                                                                                                                                                                                                                                                                                                                                                                                                                                                                                                                                                                                                                                                                                                                                                                                                                                    |                    |
| <b>Corresponding Author Secondary Information:</b>   |                                                                                                                                                                                                                                                                                                                                                                                                                                                                                                                                                                                                                                                                                                                                                                                                                                                                                                                                                                                                                                                                                                                                                                                                                                                                                                                                                                                                                                                                                                                                                                                                                                                                                                                                                                                                                                                                                                                                                                                                                                                                                                                                                                                                                                       |                    |
| <b>Corresponding Author's Institution:</b>           | Ohio State University                                                                                                                                                                                                                                                                                                                                                                                                                                                                                                                                                                                                                                                                                                                                                                                                                                                                                                                                                                                                                                                                                                                                                                                                                                                                                                                                                                                                                                                                                                                                                                                                                                                                                                                                                                                                                                                                                                                                                                                                                                                                                                                                                                                                                 |                    |
| <b>Corresponding Author's Secondary Institution:</b> |                                                                                                                                                                                                                                                                                                                                                                                                                                                                                                                                                                                                                                                                                                                                                                                                                                                                                                                                                                                                                                                                                                                                                                                                                                                                                                                                                                                                                                                                                                                                                                                                                                                                                                                                                                                                                                                                                                                                                                                                                                                                                                                                                                                                                                       |                    |
| <b>First Author:</b>                                 | Travis Johnson                                                                                                                                                                                                                                                                                                                                                                                                                                                                                                                                                                                                                                                                                                                                                                                                                                                                                                                                                                                                                                                                                                                                                                                                                                                                                                                                                                                                                                                                                                                                                                                                                                                                                                                                                                                                                                                                                                                                                                                                                                                                                                                                                                                                                        |                    |
| <b>First Author Secondary Information:</b>           |                                                                                                                                                                                                                                                                                                                                                                                                                                                                                                                                                                                                                                                                                                                                                                                                                                                                                                                                                                                                                                                                                                                                                                                                                                                                                                                                                                                                                                                                                                                                                                                                                                                                                                                                                                                                                                                                                                                                                                                                                                                                                                                                                                                                                                       |                    |
| <b>Order of Authors:</b>                             | Travis Johnson                                                                                                                                                                                                                                                                                                                                                                                                                                                                                                                                                                                                                                                                                                                                                                                                                                                                                                                                                                                                                                                                                                                                                                                                                                                                                                                                                                                                                                                                                                                                                                                                                                                                                                                                                                                                                                                                                                                                                                                                                                                                                                                                                                                                                        |                    |
|                                                      | Sihong Li                                                                                                                                                                                                                                                                                                                                                                                                                                                                                                                                                                                                                                                                                                                                                                                                                                                                                                                                                                                                                                                                                                                                                                                                                                                                                                                                                                                                                                                                                                                                                                                                                                                                                                                                                                                                                                                                                                                                                                                                                                                                                                                                                                                                                             |                    |
|                                                      | Eric Franz                                                                                                                                                                                                                                                                                                                                                                                                                                                                                                                                                                                                                                                                                                                                                                                                                                                                                                                                                                                                                                                                                                                                                                                                                                                                                                                                                                                                                                                                                                                                                                                                                                                                                                                                                                                                                                                                                                                                                                                                                                                                                                                                                                                                                            |                    |
|                                                      | Zhi Huang                                                                                                                                                                                                                                                                                                                                                                                                                                                                                                                                                                                                                                                                                                                                                                                                                                                                                                                                                                                                                                                                                                                                                                                                                                                                                                                                                                                                                                                                                                                                                                                                                                                                                                                                                                                                                                                                                                                                                                                                                                                                                                                                                                                                                             |                    |

|                                                                                                                                                                                                                                                                                                                                                                                                                                                                                                                                     |                  |
|-------------------------------------------------------------------------------------------------------------------------------------------------------------------------------------------------------------------------------------------------------------------------------------------------------------------------------------------------------------------------------------------------------------------------------------------------------------------------------------------------------------------------------------|------------------|
|                                                                                                                                                                                                                                                                                                                                                                                                                                                                                                                                     | Shuyu Dan Li     |
|                                                                                                                                                                                                                                                                                                                                                                                                                                                                                                                                     | Moray J Campbell |
|                                                                                                                                                                                                                                                                                                                                                                                                                                                                                                                                     | Kun Huang        |
|                                                                                                                                                                                                                                                                                                                                                                                                                                                                                                                                     | Yan Zhang        |
| <b>Order of Authors Secondary Information:</b>                                                                                                                                                                                                                                                                                                                                                                                                                                                                                      |                  |
| <b>Additional Information:</b>                                                                                                                                                                                                                                                                                                                                                                                                                                                                                                      |                  |
| <b>Question</b>                                                                                                                                                                                                                                                                                                                                                                                                                                                                                                                     | <b>Response</b>  |
| Are you submitting this manuscript to a special series or article collection?                                                                                                                                                                                                                                                                                                                                                                                                                                                       | No               |
| <p><b>Experimental design and statistics</b></p> <p>Full details of the experimental design and statistical methods used should be given in the Methods section, as detailed in our <a href="#">Minimum Standards Reporting Checklist</a>. Information essential to interpreting the data presented should be made available in the figure legends.</p> <p>Have you included all the information requested in your manuscript?</p>                                                                                                  | Yes              |
| <p><b>Resources</b></p> <p>A description of all resources used, including antibodies, cell lines, animals and software tools, with enough information to allow them to be uniquely identified, should be included in the Methods section. Authors are strongly encouraged to cite <a href="#">Research Resource Identifiers</a> (RRIDs) for antibodies, model organisms and tools, where possible.</p> <p>Have you included the information requested as detailed in our <a href="#">Minimum Standards Reporting Checklist</a>?</p> | Yes              |
| <p><b>Availability of data and materials</b></p> <p>All datasets and code on which the conclusions of the paper rely must be either included in your submission or</p>                                                                                                                                                                                                                                                                                                                                                              | Yes              |

deposited in [publicly available repositories](#) (where available and ethically appropriate), referencing such data using a unique identifier in the references and in the “Availability of Data and Materials” section of your manuscript.

Have you have met the above requirement as detailed in our [Minimum Standards Reporting Checklist](#)?

[Click here to view linked References](#)

1  
2  
3  
4  
5  
6  
7  
8  
9  
10  
11  
12  
13  
14  
15  
16  
17  
18  
19  
20  
21  
22  
23  
24  
25  
26  
27  
28  
29  
30  
31  
32  
33  
34  
35  
36  
37  
38  
39  
40  
41  
42  
43  
44  
45  
46  
47  
48  
49  
50  
51  
52  
53  
54  
55  
56  
57  
58  
59  
60  
61  
62  
63  
64  
65

# 1 **PseudoFuN: Deriving functional potentials of pseudogenes from integrative** 2 **relationships with genes and miRNAs across 32 cancers**

3 Travis S Johnson<sup>1</sup>, Sihong Li<sup>1</sup>, Eric Franz<sup>2</sup>, Zhi Huang<sup>3,4</sup>, Shuyu Dan Li<sup>5</sup>, Moray J Campbell<sup>6</sup>, Kun Huang<sup>4,7</sup>, Yan  
4 Zhang<sup>1\*</sup>

5  
6 <sup>1</sup> Department of Biomedical Informatics, College of Medicine, The Ohio State University, Columbus, OH  
7 43210, USA

8 <sup>2</sup> Ohio Supercomputer Center (OSC), Columbus, OH 43212, USA

9 <sup>3</sup> Department of Electrical and Computer Engineering, Purdue University, West Lafayette, IN 47907, USA

10 <sup>4</sup> School of Medicine, Indiana University, Indianapolis, IN 46202, USA

11 <sup>5</sup> Department of Genetics and Genomic Sciences, Icahn School of Medicine at Mount Sinai, New York, NY  
12 10029, USA

13 <sup>6</sup> Division of Pharmaceutics and Pharmaceutical Chemistry, College of Pharmacy, The Ohio State University,  
14 Columbus, OH 43210, USA

15 <sup>7</sup> School of Informatics and Computing, Indiana University, Indianapolis, IN 46262, USA

16 \* Correspondence: yan.zhang@osumc.edu

## 17 18 **Abstract**

19 **Background:** Long thought “relics” of evolution, not until recently have pseudogenes been of  
20 medical interest regarding regulation in cancer. Often, these regulatory roles are a direct  
21 byproduct of their close sequence homology to protein coding genes. Novel pseudogene-gene  
22 functional associations can be identified through the integration of biomedical data, such as  
23 sequence homology, functional pathways, gene expression, pseudogene expression, and  
24 miRNA expression. However, not all of the information has been integrated, and the vast  
25 majority of previous pseudogene studies relied on 1:1 pseudogene-parent gene relationships

1  
2  
3  
4  
5  
6  
7  
8  
9  
10  
11  
12  
13  
14  
15  
16  
17  
18  
19  
20  
21  
22  
23  
24  
25  
26  
27  
28  
29  
30  
31  
32  
33  
34  
35  
36  
37  
38  
39  
40  
41  
42  
43  
44  
45  
46  
47  
48  
49  
50  
51  
52  
53  
54  
55  
56  
57  
58  
59  
60  
61  
62  
63  
64  
65

1 without leveraging other homologous genes/pseudogenes. **Results:** We produce pseudogene-  
2 gene (PGG) families that expand beyond the current 1:1 paradigm. Firstly, we construct  
3 expansive PGG databases by i) CUDAlign GPU accelerated local alignment of all pseudogenes  
4 to gene families (totaling 1.6 billion individual local alignments and more than 40,000 GPU  
5 hours) and ii) BLAST-based assignment of pseudogenes to gene families. Secondly, we create  
6 an open-source web application (PseudoFuN) to search for integrative functional relationships  
7 of sequence homology, miRNA expression, gene expression, pseudogene expression, and  
8 gene ontology. We produce four “flavors” of databases (>462,000,000 pseudogene-gene  
9 pairwise alignments and 133,770 PGG families) that can be queried and downloaded using  
10 PseudoFuN. These databases are consistent with previous 1:1 pseudogene-gene annotation  
11 and also are much more powerful including millions of *de novo* pseudogene-gene associations.  
12 We find multiple known (e.g., miR20a-PTEN-PTENP1) and novel (e.g., miR375-SOX15-  
13 PPP4R1L) miRNA-gene-pseudogene associations in prostate cancer. PseudoFuN provides a  
14 “one stop shop” for identifying and visualizing thousands of potential regulatory relationships  
15 related to pseudogenes in TCGA cancers. **Conclusions:** Thousands of new pseudogene-gene  
16 associations can be explored in the context of miRNA-gene-pseudogene coexpression and  
17 differential expression with a simple-to-use online tool by bioinformaticians and oncologists  
18 alike.

19  
20 **Keywords:** Pseudogenes, database, functional prediction, gene regulation, network analysis,  
21 high performance computing, graphics processing unit, competing endogenous RNA

## 1 Background

2 Pseudogenes were previously considered unimportant relics of evolution that played an unclear  
3 role in biological processes<sup>1</sup>. However, more pseudogenes have been discovered to be involved  
4 in gene regulation<sup>2-4</sup>. These regulatory relationships between pseudogenes and genes have  
5 increasingly been explored, such as the transcriptional regulation of PTEN by pseudogene  
6 PTENP1 in several cancer conditions<sup>5</sup>. PTEN acts as a tumor suppressor gene, which is  
7 underexpressed in gastric cancer. However by overexpressing PTENP1 in gastric cancer, both  
8 PTEN underexpression and cell proliferation are mitigated via the regulatory relationship  
9 between PTEN and PTENP1<sup>6</sup>. Relationships between these pseudogenes and their parent  
10 genes have been found to play critical roles indicating functional potentials of these  
11 pseudogenes<sup>7,8</sup>. This point can most clearly be seen in the importance of sequence homology  
12 between pseudogenes and coding genes plays in competing endogenous RNA (ceRNA)  
13 networks<sup>9,10</sup>. In ceRNA networks the pseudogenes act as decoy targets for the miRNAs  
14 targeting a protein-coding gene. In short, researchers have made huge strides in understanding  
15 pseudogenes from genomic variation to functional potentials<sup>11,12</sup>, and from “deciphering” the  
16 mechanism of ceRNA networks<sup>13</sup> to experimental validation<sup>14</sup>.

17  
18 With this progress, there has been renewed interest in pseudogenes, especially in relation to  
19 cancer<sup>15</sup>. This interest has even uncovered biomarkers in human cancer including but not  
20 limited to SUMO1P3 upregulation as a diagnostic biomarker in gastric cancer and OCT4-pg4  
21 expression as a prognostic biomarker in hepatocellular carcinoma (HCC)<sup>16-18</sup>. Pseudogene  
22 expression has been used to stratify tumor subtypes in 7 distinct cancer types<sup>19</sup>. However, due  
23 to the close sequence homology between pseudogenes and their parent genes, identifying the  
24 expression profile unique to a pseudogene or highly homologous gene can be challenging.  
25 Efforts have been made to address these technical challenges in estimating pseudogene  
26 expression using modified alignment and quantification techniques<sup>20</sup>. Perhaps more intriguingly

1  
2  
3  
4  
5  
6  
7  
8  
9  
10  
11  
12  
13  
14  
15  
16  
17  
18  
19  
20  
21  
22  
23  
24  
25  
26  
27  
28  
29  
30  
31  
32  
33  
34  
35  
36  
37  
38  
39  
40  
41  
42  
43  
44  
45  
46  
47  
48  
49  
50  
51  
52  
53  
54  
55  
56  
57  
58  
59  
60  
61  
62  
63  
64  
65

1 is that pseudogenes can be somatically acquired in cancer development effectively  
2 “representing a new class of mutations” that can be either activating or inactivating mutations  
3 which function as an “on/off switch”<sup>21,22</sup>. Specific pseudogenes have been implicated in specific  
4 cancers. For example, FTH1 regulates tumorigenesis in prostate cancer<sup>23</sup>, TP73-AS1 regulates  
5 proliferation in esophageal squamous cell carcinoma<sup>24</sup>, and NKAPP1/MSTO2P/RPLP0P2 is  
6 associated with poor prognosis in lung adenocarcinoma<sup>25</sup>.

7  
8 For these reasons, having a complete understanding of these pseudogene-gene relationships is  
9 important. While studying these relationships, a common conception is to only consider the  
10 pseudogenes in relation to their parent genes with highest homology<sup>7-9,26</sup>. There have also been  
11 pioneer studies probing pseudogene functions through aligning them to parent proteins  
12 (corresponding to the parent genes) and then to parent protein domains<sup>7,27,28</sup>.

13  
14 The conventional idea of single parent genes may not be comprehensive enough to model the  
15 complex phylogenetic relationships involving multiple genes and pseudogenes in a homolog  
16 family. While pseudogenes diverged from their parent genes distantly in the past, only the  
17 daughter protein-coding genes other than the original parent gene may now exist. The result is  
18 that aligning to the true phylogenetic parent gene itself may not be possible. For this reason, we  
19 advocate the use of homologous gene families rather than single parent genes to compare  
20 against pseudogenes. By viewing the homologies as a weighted network instead of a single  
21 scalar value we believe that new relationships can be uncovered.

22  
23 We build the pseudogene-gene (PGG) family databases using two methods: i) CUDAlign<sup>29</sup>  
24 based-local alignment of all pseudogenes to gene families (totaling 1.6 billion individual local  
25 alignments and more than 40,000 GPU hours). By aligning all pseudogenes to all gene families  
26 (CUDAlign), we can study underlying sequence homology and more easily set cutoffs to assign

1 pseudogenes to gene families. ii) BLAST<sup>30</sup>-based assignment of pseudogenes to gene families.  
2 This provides a fast heuristic search option. BLAST derivative methods have been commonly  
3 used to find parent genes in previous pseudogene studies<sup>31,32</sup>. Using these two methods we  
4 show that these pseudogenes are usually assigned to the gene family of their parent genes but  
5 are often not exclusively so. Besides, most pseudogenes can be categorized into processed  
6 pseudogenes and unprocessed pseudogenes depending on whether they came from  
7 retrotranscription of mRNAs<sup>11,33,34</sup>. We take these differences into account using both of our  
8 methods (CUDAlign and BLAST).

9  
10 Furthermore, we make these data publically downloadable from GitHub<sup>35</sup>. We also create an R  
11 Shiny web application called PseudoFuN<sup>36</sup> that supports querying the PGG databases,  
12 interactive visualization and functional analysis of the PGG networks, and visualization of  
13 pseudogene-gene co-expression and miRNA binding using The Cancer Genome Atlas and  
14 GTEx (Genotype-Tissue Expression) project derived public data<sup>20,37,38</sup>. Besides, we provide  
15 another interactive web app hosted by the Ohio Supercomputer Center<sup>39</sup> (OSC), which supports  
16 querying novel sequences against any of our PGG databases and visualization of the resulting  
17 PGG networks.

18  
19 The PGG databases can be used to study pseudogene-gene-miRNA co-expression indicative of  
20 ceRNA networks across the entire Cancer Genome Atlas. With these diverse tools provided by  
21 PseudoFuN, it is possible to generate hypotheses regarding i) the regulatory roles of  
22 pseudogenes across tumor and normal tissue, ii) pseudogene-gene relationships through *de*  
23 *novo* reassignment of pseudogenes to gene families and iii) functional annotation of  
24 pseudogenes. We expect these databases and tools to have more use in cancer studies.

## 25 26 **Methods**



1  
2  
3  
4  
5  
6  
7  
8  
9  
10  
11  
12  
13  
14  
15  
16  
17  
18  
19  
20  
21  
22  
23  
24  
25  
26  
27  
28  
29  
30  
31  
32  
33  
34  
35  
36  
37  
38  
39  
40  
41  
42  
43  
44  
45  
46  
47  
48  
49  
50  
51  
52  
53  
54  
55  
56  
57  
58  
59  
60  
61  
62  
63  
64  
65

1 **Construction of Pseudogene-Gene (PGG) Database**

2 To generate these gene families, we use two methods: i) CUDAlign-based local alignment of  
3 pseudogenes against consensus sequences representing gene families, and ii) BLAST-based  
4 search of pseudogene sequences against all gene sequences (Figure 1). These two  
5 approaches can be thought of as heuristic but different processes. The local sequence  
6 alignment approach is heuristic in that only two gene sequences are used from each gene  
7 family to reduce the search space. These sequences are the most similar and representative  
8 sequences to all the other gene sequences in the family. The BLAST-based approach is  
9 heuristic in that not all sequences are fully aligned during the process due to the seed-and-  
10 extend steps of BLAST<sup>40</sup>. The result is that not every relationship between pseudogene and  
11 gene family is recorded which is an advantage in runtime but a disadvantage in studying  
12 underlying sequence homology.

13  
14 *i) CUDAlign-based local alignment of gene families*

15 Gene homolog families were generated using the Ensembl biomart gene homolog database<sup>41,42</sup>.  
16 The pairs of homologous genes were separated into connected components using python  
17 networkx package<sup>43</sup>. These connected component sub-graphs are considered gene families in  
18 this study. To reduce the number of alignments that needed to be performed, we selected  
19 consensus genes from each family that would be used to represent the entire family.

20  
21 The consensus sequences were selected by aligning every member of the gene family to every  
22 other member using local alignment with CUDAlign<sup>29</sup>. The two members of the family with the  
23 largest sum alignment scores across all other family members were selected as the consensus  
24 sequences to increase the number of candidate sequences. If only one member existed in the  
25 family, then that member was the consensus sequence. Using the list of these consensus

1  
2  
3  
4  
5  
6  
7  
8  
9  
10  
11  
12  
13  
14  
15  
16  
17  
18  
19  
20  
21  
22  
23  
24  
25  
26  
27  
28  
29  
30  
31  
32  
33  
34  
35  
36  
37  
38  
39  
40  
41  
42  
43  
44  
45  
46  
47  
48  
49  
50  
51  
52  
53  
54  
55  
56  
57  
58  
59  
60  
61  
62  
63  
64  
65

1 sequences we then aligned every consensus sequences to every pseudogene in the human  
2 genome GRCh38 annotated by GENCODE Release 25<sup>44</sup>.

3  
4 Specifically the pseudogenes are split up into processed, unprocessed and other (unclear  
5 whether processed or unprocessed), based on their mechanisms of formation<sup>45</sup>. We performed  
6 different alignment procedures for processed and unprocessed pseudogenes respectively. The  
7 processed pseudogenes were aligned to all of the consensus gene transcripts with the highest  
8 local alignment score recorded. The unprocessed pseudogenes were aligned to the full genomic  
9 sequences of each of the consensus genes with the highest local alignment score recorded.

10 Theoretically unprocessed pseudogenes can align to both exonic and intronic regions of DNA,  
11 while processed pseudogene can only align to exonic regions. In our previous database we did  
12 not perform this two-procedure strategy in part to reduce the runtime of the problem<sup>46</sup>. These  
13 changes make the database much more complete and biologically relevant. The other  
14 pseudogenes were aligned to both the transcripts and the genomic sequence recording the  
15 highest score.

16  
17 These scores, one for each combination of pseudogene to gene family, were stored for further  
18 analysis. Pseudogenes were assigned to families using a cutoff score (i.e., percentiles of the  
19 alignment scores per PGG alignment matrix) and a maximum number of assignments (i.e., the  
20 top four alignments above a cutoff). If greater than top four alignments were used, the PGG  
21 families were too large to calculate the pairwise alignment matrix. The resulting sets of  
22 pseudogenes and genes are called pseudogene-gene (PGG) families. This method was used to  
23 allow a pseudogene to be assigned multiple families as well as prevent pseudogenes from  
24 being assigned families if their alignment score was low. We used the 99<sup>th</sup> percentile cutoff  
25 (corresponding alignment score 54), 99.9<sup>th</sup> percentile cutoff (135), and the 99.99<sup>th</sup> percentile  
26 cutoff (198) to generate three resultant databases named CUDAlign54, CUDAlign135, and

1  
2  
3  
4  
5  
6  
7  
8  
9  
10  
11  
12  
13  
14  
15  
16  
17  
18  
19  
20  
21  
22  
23  
24  
25  
26  
27  
28  
29  
30  
31  
32  
33  
34  
35  
36  
37  
38  
39  
40  
41  
42  
43  
44  
45  
46  
47  
48  
49  
50  
51  
52  
53  
54  
55  
56  
57  
58  
59  
60  
61  
62  
63  
64  
65

1 CUDAlign198 respectively. All these flavors of databases are available for search in our web  
2 apps.

3  
4 *ii) BLAST-based generation of PGG families*

5 In contrast to the local alignment of every combination of pseudogene to gene family, PGG  
6 families were also created by assigning the pseudogenes to the family containing its closest  
7 BLAST search match. This approach was used to contrast with the CUDAlign method, which  
8 uses up to the top 4 matches. The pseudogenes were separated into processed, unprocessed  
9 and other. Then, all genes in the GENCODE Release 25 annotation were used to generate  
10 genomic, transcript, and combined BLAST databases (blastdb). The processed pseudogenes  
11 would be blasted against transcript blastdb, unprocessed against the genomic sequence  
12 blastdb, and the rest pseudogenes were blasted against the combined genomic/transcript  
13 blastdb. The pseudogene was assigned to the gene family containing the best match from the  
14 BLAST search.

15  
16 ***Comparison between PGG families and pseudogene-parent gene pairs***

17 We also conduct a comparison to the Pseudogene.org resource<sup>47</sup>. In this comparison, we  
18 consider pseudogenes and parent gene pairs from pseudogene.org psiDr<sup>31</sup> database (old)<sup>48</sup> and  
19 on GENCODE Release 10 from pseudogene.org psiCube<sup>11</sup> database (new)<sup>49</sup>. From our  
20 databases, we consider every combination of pseudogene to gene within a PGG family as a  
21 pair (for example, a family with 3 genes and 2 pseudogenes would have  $C_2^3 = 6$  pairs). Since we  
22 have multiple flavors of PGG databases including the BLAST-based version and the CUDAlign-  
23 based versions, we compare the intersections between two Pseudogene.org versions and our  
24 BLAST/CUDAlign-based versions. We show the intersections of pseudogene-gene pairs in  
25 Venn Diagrams.

1  
2  
3  
4  
5  
6  
7  
8  
9  
10  
11  
12  
13  
14  
15  
16  
17  
18  
19  
20  
21  
22  
23  
24  
25  
26  
27  
28  
29  
30  
31  
32  
33  
34  
35  
36  
37  
38  
39  
40  
41  
42  
43  
44  
45  
46  
47  
48  
49  
50  
51  
52  
53  
54  
55  
56  
57  
58  
59  
60  
61  
62  
63  
64  
65

1  
2  
3  
4  
5  
6  
7  
8  
9  
10  
11  
12  
13  
14  
15  
16  
17  
18  
19  
20  
21  
22  
23  
24  
25  
26  
27  
28  
29  
30  
31  
32  
33  
34  
35  
36  
37  
38  
39  
40  
41  
42  
43  
44  
45  
46  
47  
48  
49  
50  
51  
52  
53  
54  
55  
56  
57  
58  
59  
60  
61  
62  
63  
64  
65

**Development of PseudoFuN web applications**

Aside from generating different flavors of the PGG databases, we assemble them into an online R Shiny application called PseudoFuN<sup>36</sup> which supports gene and pseudogene symbol queries against our PGG databases, generates dynamic networks, produces Gene Ontology<sup>50</sup> (GO) tables and additional functional analysis features (Table 1). The functionalities, such as calculating the gene co-expression for any resultant PGG network in any of the TCGA<sup>51</sup> cancers types, are important for ceRNA network hypothesis generation in human cancers. For more information, please visit the PseudoFuN website and follow the README and tutorial.

Additionally we create another web app hosted by the Ohio Supercomputer Center (OSC) OnDemand<sup>52</sup> platform. This application has multiple functionalities including the query of Ensembl gene ID or a novel sequence against one selected flavor of our databases. For each of these features we provide a simple-to-use interface that allows users to select which database to query, allows download of the query hits, and allows users to interactively explore the PGG family networks including GO information.

**Use cases in multiple cancers**

Furthermore three use cases are provided to show the potential utility of PseudoFuN to researchers and oncologists looking for functional relationships between pseudogenes, genes, and miRNAs. Use Case I validates known pseudogene-gene functional relationships. Use Case II identifies high confidence novel miRNA-pseudogene-gene relationships. Use Case III is primarily focused on agreement with a validation study. We focused on pseudogenes/genes that were differentially expressed in low RARG/low TACC1/high miR-96 compared to the reverse in prostate cancer cell lines and also differentially expressed in our PGG networks in TCGA prostate cancer samples.

1  
2  
3  
4  
5  
6  
7  
8  
9  
10  
11  
12  
13  
14  
15  
16  
17  
18  
19  
20  
21  
22  
23  
24  
25  
26  
27  
28  
29  
30  
31  
32  
33  
34  
35  
36  
37  
38  
39  
40  
41  
42  
43  
44  
45  
46  
47  
48  
49  
50  
51  
52  
53  
54  
55  
56  
57  
58  
59  
60  
61  
62  
63  
64  
65

1  
2  
3  
4  
5  
6  
7  
8  
9  
10  
11  
12  
13  
14  
15  
16  
17  
18  
19  
20  
21  
22  
23  
24  
25  
26  
27  
28  
29  
30  
31  
32  
33  
34  
35  
36  
37  
38  
39  
40  
41  
42  
43  
44  
45  
46  
47  
48  
49  
50  
51  
52  
53  
54  
55  
56  
57  
58  
59  
60  
61  
62  
63  
64  
65

## Results

### *Local alignment of gene families*

We performed 1.6 billion local alignments between all pseudogenes and all gene family consensus sequences. The process required over 40,000 GPU hours on the Oakley cluster at the OSC. The highest scores for each gene family and pseudogene were stored in a 17,273x26,754 matrix of pseudogene-to-gene-family alignment scores (~462 million elements). From this matrix, we are able to explore global pseudogene-gene family homology relationships and assign pseudogenes to one or more gene families with high sequence homology.

As one might expect, the number of pseudogenes with high alignments (defined as above a percentile threshold) to many gene families is relatively low. It can be seen that the majority of pseudogenes will align to one gene family in the CUDAlign databases (Figure 2). Another feature of note is that there are some pseudogenes that align to many gene families (e.g., 9 pseudogenes have alignment scores above 54 in 15,000 gene families and 571 pseudogenes have alignment scores above 54 in 1,000 gene families). In contrast to previous belief in single gene-pseudogene homology, some pseudogenes are related to many genes. It is worth considering that these high homology pseudogenes (e.g., FTLP10 with 3,006 gene family pairwise alignments over a 54 threshold) may have a role in regulating major biological processes<sup>53</sup> and disease<sup>54</sup>.

### *BLAST generation of PGG families*

The BLAST generated database was larger than the CUDAlign generated databases with 68,578 total connections. This database was also much simpler to compute with since it was not an exhaustive search. These conclusions make it a simple method to quickly estimate the pseudogene-to-gene relationships.

1  
2  
3  
4  
5  
6  
7  
8  
9  
10  
11  
12  
13  
14  
15  
16  
17  
18  
19  
20  
21  
22  
23  
24  
25  
26  
27  
28  
29  
30  
31  
32  
33  
34  
35  
36  
37  
38  
39  
40  
41  
42  
43  
44  
45  
46  
47  
48  
49  
50  
51  
52  
53  
54  
55  
56  
57  
58  
59  
60  
61  
62  
63  
64  
65

1

## 2 *Direct comparison to pseudogene parents*

3 We compare our databases to the previous pseudogene-parent gene databases retrieved from  
4 Pseudogene.org resources (Figure 3). It shows that our methods reconstruct most of the  
5 pseudogene-parent-gene relationships identified by Pseudogene.org. The overall consistency of  
6 our databases (BLAST and CUDAlign) with both Pseudogenes.org databases (new and old)  
7 was 75% (i.e., all our databases combined). Individually, the BLAST-based database contained  
8 61% of the Pseudogene.org relationships (both new and old) and the CUDAlign 54 cutoff  
9 contained 60% of the Pseudogene.org relationships (both new and old). Our databases also  
10 generate a larger pool of possible interactions.

11

## 12 *Development of a pseudogene query tool*

13 The R Shiny application is a comprehensive hypothesis generating tool that is freely available  
14 on the internet<sup>36</sup>. This tool provides a wide array of functionality that a researcher can access  
15 quickly and download results as the raw data for more in-depth analysis. These features are  
16 outlined in detail in Table 1.

17

## 18 *Use Cases: Assisting functional study of ceRNA networks in cancer*

19 To illustrate the utility of our databases and tools we present three use cases.

20

21 Use Case I: To validate known pseudogene-gene relationships we query pseudogenes or  
22 genes of interest individually, e.g., PTENP1, or KRASP1, FTH1P1, GBP1P1. We query a  
23 gene/pseudogene name one at a time, PseudoFuN will return the top PGG network(s) that  
24 contain the query (Figure 4). PTENP1 is a processed pseudogene homologous to PTEN, a  
25 tumor suppressor gene. PTENP1 is selectively lost in cancer and may regulate PTEN  
26 expression as a miRNA decoy target<sup>5,6</sup>. We have observed differential co-expression patterns of

1  
2  
3  
4  
5  
6  
7  
8  
9  
10  
11  
12  
13  
14  
15  
16  
17  
18  
19  
20  
21  
22  
23  
24  
25  
26  
27  
28  
29  
30  
31  
32  
33  
34  
35  
36  
37  
38  
39  
40  
41  
42  
43  
44  
45  
46  
47  
48  
49  
50  
51  
52  
53  
54  
55  
56  
57  
58  
59  
60  
61  
62  
63  
64  
65

1 PGG families in tumor vs. normal for PTENP1 network in multiple cancers including prostate  
2 cancer (Supplementary Figure 2B,C). We identified known miRNAs (hsa-miR-20a in prostate  
3 cancer<sup>55</sup>) targeting PTEN PGG network nodes providing insights into ceRNA regulation  
4 (Supplementary Figure 2D). These insights are important since some pseudogenes  
5 competitively bind to miRNAs thus regulate gene expression. We also identify hsa-miR103a-3p  
6 as potentially targeting both PTEN and PTENP1 (Supplementary Figure 2D). The ceRNA  
7 network regulatory relationship is governed by effect modulation of miRNA on gene expression  
8 by pseudogene expression (Supplementary Figure 1A,C,E). This leads to a correlation between  
9 pseudogene (miRNA decoy targets) and gene (miRNA targets) expression (Supplementary  
10 Figure 1D). That means both these pseudogenes and homologous genes competitively bind to  
11 miRNAs. KRAS-KRAS P1 regulatory network was also identified by our database (Figure 4).  
12 KRAS and KRAS P1 are known to be involved in ceRNA network regulation<sup>5,10,55</sup>. PseudoFuN  
13 query of KRAS identified co-expression patterns in prostate cancer consistent with ceRNA  
14 network regulation by hsa-miR-145, a known modulator of KRAS in prostate cancer<sup>56</sup>. The  
15 FTH1 query also resulted in the identification of pseudogenes (FTH1P2, FTH1P8, FTH1P11,  
16 FTH1P16) that regulate FTH1 in prostate cancer<sup>23</sup> as well novel miRNAs that may be involved  
17 in ceRNA network regulation of FTH1 in prostate cancer. GBP1 is an IFN- $\alpha$  induced transcript  
18 that is involved in immune response in prostate cancer<sup>57</sup>. The GBP1 involved PGG network also  
19 contained the pseudogene GBP1P1 which may have a ceRNA regulatory role in breast cancer<sup>58</sup>  
20 and in some neurodegenerative diseases<sup>59</sup>.

21  
22 Use Case II: We wanted to identify possible gene-miRNA relationships of interest within our  
23 database. We chose to study these relationships with respect to miR-96, a known cancer  
24 regulator microRNA in prostate cancer<sup>60</sup>. Through differential expression analysis between  
25 tumors in the TCGA-PRAD cohort with lower expression of RARG and TACC1 (also a miR-96  
26 target) and high expression miR-96 (low RARG/low TACC1/high miR-96), compared to the

1 reverse, we previously identified altered SOX15 gene expression is significantly associated with  
2 worse disease free survival. We visualized expression patterns of SOX15 PGG families, and  
3 corresponding miRNA associations. miR-96 is included as a validation.

4  
5 Interestingly we identified the pseudogene PPP4R1L as a potential member of a SOX15 ceRNA  
6 network (Figure 5A). PPP4R1L and SOX15 are both significantly differentially expressed  
7 between tumor and normal controls (Bonferroni corrected p-value =  $3.42 \times 10^{-7}$ ,  $2.01 \times 10^{-14}$   
8 respectively, Figure 5E). PPP4R1L and SOX15 are significantly co-expressed (Pearson  
9 correlation coefficient (PCC)=0.51, p-value< $2.2 \times 10^{-16}$ ) in tumor tissue but much less correlated  
10 in normal controls in prostate cancer (PCC=0.24, p-value=0.09, Figure 5B,C). Positively  
11 correlated expression is an assumption when determining ceRNA network relationships<sup>61</sup>  
12 (Supplementary Figure 1). Both SOX15 and PPP4R1L are likely regulated by hsa-miR-375  
13 based on the TCGA prostate cancer dataset. hsa-miR-375 is associated with docetaxel  
14 resistance in prostate cancer<sup>62,63</sup> and PPP4R1L knock-down in HeLa cells induces taxol  
15 resistance<sup>64</sup>. These findings are intriguing since taxol and docetaxel are closely related chemical  
16 compounds. PPP4R1L is also located in a region associated with high mutation rates in cancer  
17 cell lines<sup>64</sup> which could be indicative of mutational “on/off switches” in pseudogene regulation.

18  
19 Use Case III: We were most interested in the differentially expressed (DE) genes (and related  
20 pseudogenes) that both appeared in our PGG database and were contained in networks with  
21 genes differentially expressed in low RARG/low TACC1/high miR-96 compared to vice versa.  
22 We searched the DE genes in our PGG database, and identified the top networks with enriched  
23 number of DE genes. As a result, parent genes HTR7, CNN2, MSN and TAGLN2 are  
24 differentially expressed; they generate pseudogenes, which are specifically expressed in  
25 prostate cancer samples<sup>16</sup>. These four parent genes are also detected in our 5 top PGG families  
26 involving miR-96 regulated (direct or indirect) DE genes. We identified HTR7P1 pseudogene in



1 the same PGG family as HTR7 gene, which is potentially regulated by hsa-miR-607 and has-  
2 miR-3654 in the TCGA prostate cancer dataset (Supplementary Figure 3). 11 CNN2  
3 pseudogenes (CNN2P1-CCN2P4, CNN2P6-CNN2P12) were identified in the CNN2 PGG family  
4 along with TAGLN2 and TAGLN2P1. TAGLN2P1 is differentially expressed between the tumor  
5 and normal samples in the prostate dataset (Supplementary Figure 4, Bonferroni corrected p-  
6 value =  $6.23 \times 10^{-4}$ ). MSN and MSNP1 were in the same PGG family and hsa-miR-96 potentially  
7 regulates MSN in the TCGA prostate cancer dataset (Supplementary Figure 4). In addition,  
8 although our DE genes were detected from prostate cancer, we further compared them with DE  
9 pseudogenes identified in four other cancer types and we observed interesting results (see  
10 Supplementary Materials - *Potential regulatory roles in cancer*).

## 11 12 **Discussion**

13 We identify 133,770 PGG families that have significant potential to reveal important information  
14 about regulatory pseudogene-gene relationships in health and disease. Within these families we  
15 identify both new and existing regulatory networks that contain pseudogenes such as PTENP1,  
16 KRAS1P, FTH1P8/11/16, and GBP1P1 (Figure 4). Since all genes and all pseudogenes are  
17 included in our database there are thousands of opportunities to identify new regulatory  
18 relationships. These thousands of opportunities can be easily stratified using gene name,  
19 pseudogene name and cancer type. Our web application makes it a simple and intuitive process  
20 to query pseudogenes (or genes) to identify which gene families they may be regulating as well  
21 as the functions that are attributed to the members of the network. We also have an application  
22 hosted by the OSC that allows the querying of novel sequences against our database.

23  
24 From these networks, we can also identify possible relationships of differentially expressed  
25 pseudogenes in various cancers. For instance, both PPP4R1L pseudogene and SOX15 are  
26 differentially expressed in prostate cancer and associated with hsa-miR-375. These types of

1  
2  
3  
4  
5  
6  
7  
8  
9  
10  
11  
12  
13  
14  
15  
16  
17  
18  
19  
20  
21  
22  
23  
24  
25  
26  
27  
28  
29  
30  
31  
32  
33  
34  
35  
36  
37  
38  
39  
40  
41  
42  
43  
44  
45  
46  
47  
48  
49  
50  
51  
52  
53  
54  
55  
56  
57  
58  
59  
60  
61  
62  
63  
64  
65

1 relationships should be further evaluated along with more complex regulation with multiple  
2 miRNAs, pseudogenes, and genes. It is experimentally shown that SOX15 is regulated by hsa-  
3 miR-96<sup>60</sup>. It may be important to include hsa-miR-96 in the hsa-miR-375-SOX15-PPP4R1L  
4 potential ceRNA network. Aside from PGG family specific differential pseudogene expression,  
5 the PseudoFuN app allows for comprehensive differential pseudogene expression (DPgE)  
6 analysis in any of the TCGA cancer datasets.

7  
8 The use of this database also has utility in integrative analysis where the databases can be  
9 used as a mask for other data modalities. Some examples would be using the nodes (genes  
10 and pseudogenes) in each of the PGG families as groups in gene expression experiments.  
11 Similarly, these groups could be used for feature reduction when visualizing data. We hope  
12 researchers can use these relationships we have identified to reduce large numbers of  
13 candidate associations down to numbers that can be easily validated and generate new  
14 candidates when querying novel sequences. For instance, miRNA-gene pairs filtered through  
15 the sets of PGG families would identify high priority ceRNA candidates.

16  
17 **Conclusions**

18 We generate multiple large databases of pseudogene gene family relationships and the tools to  
19 study them for use by biomedical researchers. These databases are more comprehensive than  
20 previous pseudogene-gene databases by including many more homology relationships in PGG  
21 families, thus more powerful for experiment validation and knowledge discovery. These  
22 databases are useful in identifying pseudogene-gene regulatory relationships in 32 cancer types  
23 and show high similarity with known pseudogene-gene relationships. Aside from the known  
24 relationships we identify many unknown relationships. Furthermore, these databases and  
25 associated analyses can be easily accessed online or through the OSC OnDemand platform,  
26 allowing for novel hypotheses to be assessed quickly by biomedical researchers. We find

1  
2  
3  
4  
5  
6  
7  
8  
9  
10  
11  
12  
13  
14  
15  
16  
17  
18  
19  
20  
21  
22  
23  
24  
25  
26  
27  
28  
29  
30  
31  
32  
33  
34  
35  
36  
37  
38  
39  
40  
41  
42  
43  
44  
45  
46  
47  
48  
49  
50  
51  
52  
53  
54  
55  
56  
57  
58  
59  
60  
61  
62  
63  
64  
65

1 evidence of both known regulatory pseudogene-gene relationships and novel hypothesized  
2 relationships that we plan to validate. PseudoFuN is a comprehensive, dynamic tool that allows  
3 any bioinformatician or oncologist to find novel regulatory pseudogenes within their cancer or  
4 gene of interest.

### 6 **Availability of Supporting Data**

7 We have made the PGG family data publically downloadable from GitHub<sup>35</sup>. We also created an  
8 R Shiny web application called PseudoFuN<sup>36</sup> that supports querying the PGG databases,  
9 interactive visualization and functional analysis of the PGG networks, and visualization of  
10 pseudogene-gene co-expression and miRNA binding. Besides, we provide another interactive  
11 web app hosted on Ohio Supercomputer Center (OSC) OnDemand, which supports querying  
12 novel sequences against any of our PGG databases and visualization of the resulting PGG  
13 networks.

### 15 **Additional Files**

16 There is an additional Supplementary Materials file containing additional information on the data  
17 and additional analyses. It includes the following figures and tables:

18 **Supplementary Figure 1. Example of ceRNA network regulation of gene expression.** A) A  
19 graphical view of how pseudogene expression can regulate gene expression. B) A cellular view  
20 of ceRNA network regulation. C) Equations used to model the correlation between gene and  
21 pseudogene expression in a ceRNA network. D) The distribution of the gene-pseudogene  
22 correlations based on the models in C. E) The effect that pseudogene expression has on the  
23 miRNA induced change in gene expression.

24 **Supplementary Figure 2. PseudoFuN online output for PTEN PGG family.** A) Interactive  
25 graph visualization of the PTEN PGG network. B) TCGA prostate co-expression matrix for

1  
2  
3  
4  
5  
6  
7  
8  
9  
10  
11  
12  
13  
14  
15  
16  
17  
18  
19  
20  
21  
22  
23  
24  
25  
26  
27  
28  
29  
30  
31  
32  
33  
34  
35  
36  
37  
38  
39  
40  
41  
42  
43  
44  
45  
46  
47  
48  
49  
50  
51  
52  
53  
54  
55  
56  
57  
58  
59  
60  
61  
62  
63  
64  
65

1 PTEN PGG family genes and pseudogenes across normal samples. C) TCGA prostate co-  
2 expression matrix for PTEN PGG family genes and pseudogenes across tumor samples. D)  
3 Negatively correlated miRNAs for all members of the PTEN PGG family. E) Differential gene  
4 and pseudogene expression for tumor and normal samples for each member of the PTEN PGG  
5 family in the prostate cancer TCGA dataset.

6 **Supplementary Figure 3. PseudoFuN online output for HTR7 PGG family.** A) Interactive  
7 graph visualization of the HTR7 PGG network. B) TCGA prostate co-expression matrix for  
8 HTR7 PGG family genes and pseudogenes across normal samples. C) TCGA prostate co-  
9 expression matrix for HTR7 PGG family genes and pseudogenes across tumor samples. D)  
10 Negatively correlated miRNAs for all members of the HTR7 PGG family. E) Differential gene  
11 and pseudogene expression for tumor and normal samples for each member of the HTR7 PGG  
12 family in the prostate cancer TCGA dataset.

13 **Supplementary Figure 4. PseudoFuN online output for CNN2/TAGLN2 PGG family.** A)  
14 Interactive graph visualization of the CNN2/TAGLN2 PGG network. B) TCGA prostate co-  
15 expression matrix for CNN2/TAGLN2 PGG family genes and pseudogenes across normal  
16 samples. C) TCGA prostate co-expression matrix for CNN2/TAGLN2 PGG family genes and  
17 pseudogenes across tumor samples. D) Negatively correlated miRNAs for all members of the  
18 CNN2/TAGLN2 PGG family. E) Differential gene and pseudogene expression for tumor and  
19 normal samples for each member of the CNN2/TAGLN2 PGG family in the prostate cancer  
20 TCGA dataset.

21 **Supplementary Figure 5. PseudoFuN online output for MSN PGG family.** A) Interactive  
22 graph visualization of the MSN PGG network. B) TCGA prostate co-expression matrix for MSN  
23 PGG family genes and pseudogenes across normal samples. C) TCGA prostate co-expression  
24 matrix for MSN PGG family genes and pseudogenes across tumor samples. D) Negatively

1  
2  
3  
4 1 correlated miRNAs for all members of the MSN PGG family. E) Differential gene and  
5  
6 2 pseudogene expression for tumor and normal samples for each member of the MSN PGG  
7  
8 3 family in the prostate cancer TCGA dataset.  
9

10  
11 4 **Supplementary Figure 6. The PGG families in our network with the most DE genes after**  
12  
13 5 **mir-96 treatment.** The line weights indicate the sequence homology between members of the  
14  
15 6 PGG family. Red nodes indicate mir96 targets. Yellow nodes with names indicate other genes  
16  
17 7 contained in the PGG family. Yellow nodes without names are pseudogenes contained within  
18  
19 8 the network.  
20  
21

22  
23 9 **Supplementary Figure 7. The user interface of the OSC OnDemand web application.** A) is  
24  
25 10 the main query page where a user can search either sequences or ensemble gene IDs. B) is a  
26  
27 11 representative output of one of the gene searches. This includes an interactive network and the  
28  
29 12 GO information.  
30  
31

32  
33 13 **Supplementary Figure 8. GBP1P1 DE in TCGA prostate cancer** (information retrieved from  
34  
35 14 Han et al.).  
36  
37

38  
39 15 **Supplementary Table 1. DE parent gene/pseudogenes potentially regulated by miRr-96 in**  
40  
41 16 **prostate cancer vs. TCGA derived DE pseudogenes.**  
42  
43

## 44 17 **Abbreviations**

45  
46 18 PseudoFuN: Pseudogene Functional Networks  
47  
48 19 PGG: Pseudogene-Gene (i.e., PGG families)  
49  
50 20 TCGA: The Cancer Genome Atlas  
51  
52 21 ceRNA: Competing Endogenous RiboNucleic Acid  
53  
54 22 HCC: HepatoCellular Carcinoma  
55  
56 23 BLAST: Basic Local Alignment and Search Tool  
57  
58 24 OSC: Ohio Supercomputer Center  
59  
60  
61  
62  
63  
64  
65

1  
2  
3  
4  
5  
6  
7  
8  
9  
10  
11  
12  
13  
14  
15  
16  
17  
18  
19  
20  
21  
22  
23  
24  
25  
26  
27  
28  
29  
30  
31  
32  
33  
34  
35  
36  
37  
38  
39  
40  
41  
42  
43  
44  
45  
46  
47  
48  
49  
50  
51  
52  
53  
54  
55  
56  
57  
58  
59  
60  
61  
62  
63  
64  
65

- 1 GO: Gene Ontology
- 2 DE: Differential Expression
- 3 DGE: Differential Gene Expression
- 4 DPgE: Differential Pseudogene Expression

5

6 **Acknowledgments**

7 This work is partially supported by NIH-NLM MIDAS Training Fellowship (4T15LM011270-05)  
8 awarded to Travis Johnson and The Ohio State University Startup Funds to Yan Zhang. The  
9 authors also thank the Ohio Supercomputer Center (OSC) for providing computing resources.

10

11 **Author contributions**

12 TSJ, SL, ZH and YZ performed data analyses. TSJ, EF and ZH developed the web applications.  
13 YZ and TSJ conceived and initiated this project. YZ and KH supervised the project. MJC  
14 provided experimental data. All authors contributed to biological interpretation. TSJ, YZ, MJC  
15 and SDL wrote the manuscript. All authors read and approved the manuscript.

16

17 **Ethics approval and consent to participate**

18 Not applicable.

19

20 **Consent for publication**

21 Not applicable.

22

23 **Competing interests**

24 The authors declare that they have no competing interests.

1  
2  
3  
4  
5  
6  
7  
8  
9  
10  
11  
12  
13  
14  
15  
16  
17  
18  
19  
20  
21  
22  
23  
24  
25  
26  
27  
28  
29  
30  
31  
32  
33  
34  
35  
36  
37  
38  
39  
40  
41  
42  
43  
44  
45  
46  
47  
48  
49  
50  
51  
52  
53  
54  
55  
56  
57  
58  
59  
60  
61  
62  
63  
64  
65

1 **Figure Captions**

2 **Figure 1. Workflow for both CUDAlign and BLAST databases.** Left side PGG families are  
3 produced using the BLAST matches. Right side PGG families are produced using the  
4 pseudogene-gene-family alignment matrix with percentile cutoffs using CUDAlign.

5 **Figure 2. The number pseudogenes that align to gene families.** The x-axis is the number of  
6 gene families which have an alignment score above a specified cutoff (the different colored  
7 lines). The y-axis is the number of pseudogenes with an alignment score higher than the cutoff  
8 to the number of gene families on the x-axis. The inset grey box is a closer view of the low  
9 range gene family numbers (1-10) to show more granular patterns.

10 **Figure 3. Comparison of database members.** The top 6 plots are comparisons between the  
11 CUDAlign databases using different cutoffs, the BLAST database, and the Pseudogene.org  
12 parent genes. The bottom row shows intra-database comparisons, left: Pseudogene.org,  
13 middle: CUDAlign databased of different alignment score cutoffs, right: relative size of all  
14 databases.

15 **Figure 4. Representative examples of our OSC OnDemand pseudogene query tool.**  
16 Displayed are the network relationships from our databases for three common ceRNA network  
17 examples (queries: FTH1, KRAS, PTEN), and a relationship of interest (GBP1-GBP1P1).

18 **Figure 5. PseudoFuN online output for SOX15 PGG family.** A) Interactive graph visualization  
19 of the SOX15 PGG network. B) TCGA prostate co-expression matrix for SOX15 PGG family  
20 genes and pseudogenes across normal samples. C) TCGA prostate co-expression matrix for  
21 SOX15 PGG family genes and pseudogenes across tumor samples. D) Negatively correlated  
22 miRNAs for all members of the SOX15 PGG family. E) Differential gene and pseudogene  
23 expression for tumor and normal samples for each member of the SOX15 PGG family in the  
24 prostate cancer TCGA dataset.

1  
2  
3  
4 **1 Tables**

5  
6 **2 Table 2. Summary of PseudoFuN features that are freely available at the PseudoFuN website.**

7  
8  
9  
10  
11  
12  
13  
14  
15  
16  
17  
18  
19  
20  
21  
22  
23  
24  
25  
26  
27  
28  
29  
30  
31  
32  
33  
34  
35  
36  
37  
38  
39  
40  
41  
42  
43  
44  
45  
46  
47  
48  
49  
50  
51  
52  
53  
54  
55  
56  
57  
58  
59  
60  
61  
62  
63  
64  
65

| <b>PseudoFuN features</b>                                                                  | <b>Additional description</b>                                                                                                                                                                                                                                                                                                                         |
|--------------------------------------------------------------------------------------------|-------------------------------------------------------------------------------------------------------------------------------------------------------------------------------------------------------------------------------------------------------------------------------------------------------------------------------------------------------|
| Interactive visualization of PGG family networks including the query pseudogene/gene       | Users can query any single gene or pseudogene symbol, e.g., PTENP1. Nodes are colored by sub-clusters within the network.                                                                                                                                                                                                                             |
| Functional enrichment analysis of PGG family                                               | Functional enrichment can be conducted on the genes within the PGG family on Biological Process, Molecular Function or Cellular Components annotations. The GO functional enrichment is calculated with:<br>1. Fisher's exact test <sup>65</sup><br>2. Kolmogorov-Smirnov (KS) Classic <sup>66</sup><br>3. Kolmogorov-Smirnov (KS) Elim <sup>66</sup> |
| Genomic loci mapping of PGG family                                                         | The genes in the PGG family can be mapped back to the genome using a circus plot to identify potential loci of interest.                                                                                                                                                                                                                              |
| Data download for all of the figures                                                       | Users can also download results including:<br>1. the differential pseudogene expression (DPgE) table for all pseudogenes in the selected cancer<br>2. the gene and pseudogene expression<br>3. miRNA correlation table                                                                                                                                |
| Links to other gene databases for more information                                         | By directly clicking the node in the network, users can open the GeneCards website <sup>67</sup> for detailed gene information.                                                                                                                                                                                                                       |
| Gene/pseudogene co-expression analysis across the entire TCGA                              | Once a PGG family has been identified the gene/pseudogene co-expression matrix is calculated across one of the 32 available TCGA cancer types.                                                                                                                                                                                                        |
| Tumor vs. normal differential expression of genes/pseudogenes across all TCGA cancer types | The gene/pseudogene differential expression is calculated for all members of the selected PGG family. There is also an option to run differential expression on a specified cancer for all pseudogenes which can be viewed or downloaded as a table.                                                                                                  |
| Predicted miRNA targets involved in the PGG families across all TCGA cancer types          | The miRNA targets involved in the selected cancer and PGG family are displayed to show which miRNAs could regulate the PGG family members. This is by using the miRNA correlation tables from                                                                                                                                                         |



1  
2  
3  
4  
5  
6  
7  
8  
9  
10  
11  
12  
13  
14  
15  
16  
17  
18  
19  
20  
21  
22  
23  
24  
25  
26  
27  
28  
29  
30  
31  
32  
33  
34  
35  
36  
37  
38  
39  
40  
41  
42  
43  
44  
45  
46  
47  
48  
49  
50  
51  
52  
53  
54  
55  
56  
57  
58  
59  
60  
61  
62  
63  
64  
65

1

|                                                    |                                                                                                                                                                                                                        |
|----------------------------------------------------|------------------------------------------------------------------------------------------------------------------------------------------------------------------------------------------------------------------------|
|                                                    | the TCGA.                                                                                                                                                                                                              |
| Differential Pseudogene Expression (DPgE) Analysis | Differential pseudogene expression is calculated for each of the pseudogenes in TCGA cancers using dreamBase expression information <sup>20</sup> . The online tool allows for manipulation and download of the table. |

|

## 1 References

- 2 1. Vanin EF: Processed pseudogenes: characteristics and evolution. *Annu Rev Genet* 19:253-72, 1985
- 3 2. Mighell AJ, Smith NR, Robinson PA, et al: Vertebrate pseudogenes. *FEBS Lett* 468:109-14, 2000
- 4 3. Pink RC, Wicks K, Caley DP, et al: Pseudogenes: pseudo-functional or key regulators in health and disease? *RNA* 17:792-8, 2011
- 5 4. Chan JJ, Tay Y: Noncoding RNA:RNA Regulatory Networks in Cancer. *Int J Mol Sci* 19, 2018
- 6 5. Poliseno L, Salmena L, Zhang J, et al: A coding-independent function of gene and pseudogene mRNAs regulates tumour biology. *Nature* 465:1033-8, 2010
- 7 6. Zhang R, Guo Y, Ma Z, et al: Long non-coding RNA PTENP1 functions as a ceRNA to modulate PTEN level by decoying miR-106b and miR-93 in gastric cancer. *Oncotarget* 8:26079-26089, 2017
- 8 7. Lam HY, Khurana E, Fang G, et al: Pseudofam: the pseudogene families database. *Nucleic Acids Res* 37:D738-43, 2009
- 9 8. Zheng D, Gerstein MB: A computational approach for identifying pseudogenes in the ENCODE regions. *Genome Biol* 7 Suppl 1:S13 1-10, 2006
- 10 9. An Y, Furber KL, Ji S: Pseudogenes regulate parental gene expression via ceRNA network. *J Cell Mol Med* 21:185-192, 2017
- 11 10. Poliseno L, Pandolfi PP: PTEN ceRNA networks in human cancer. *Methods* 77-78:41-50, 2015
- 12 11. Sisu C, Pei B, Leng J, et al: Comparative analysis of pseudogenes across three phyla. *Proc Natl Acad Sci U S A* 111:13361-6, 2014
- 13 12. Zhang Y, Li S, Abyzov A, et al: Landscape and variation of novel retroduplications in 26 human populations. *PLoS Comput Biol* 13:e1005567, 2017
- 14 13. Cesana M, Daley GQ: Deciphering the rules of ceRNA networks. *Proc Natl Acad Sci U S A* 110:7112-3, 2013
- 15 14. Chiu HS, Martinez MR, Bansal M, et al: High-throughput validation of ceRNA regulatory networks. *BMC Genomics* 18:418, 2017
- 16 15. Poliseno L, Marranci A, Pandolfi PP: Pseudogenes in Human Cancer. *Front Med (Lausanne)* 2:68, 2015
- 17 16. Kalyana-Sundaram S, Kumar-Sinha C, Shankar S, et al: Expressed pseudogenes in the transcriptional landscape of human cancers. *Cell* 149:1622-34, 2012
- 18 17. Mei D, Song H, Wang K, et al: Up-regulation of SUMO1 pseudogene 3 (SUMO1P3) in gastric cancer and its clinical association. *Med Oncol* 30:709, 2013
- 19 18. Wang L, Guo ZY, Zhang R, et al: Pseudogene OCT4-pg4 functions as a natural micro RNA sponge to regulate OCT4 expression by competing for miR-145 in hepatocellular carcinoma. *Carcinogenesis* 34:1773-81, 2013
- 20 19. Han L, Yuan Y, Zheng S, et al: The Pan-Cancer analysis of pseudogene expression reveals biologically and clinically relevant tumour subtypes. *Nat Commun* 5:3963, 2014
- 21 20. Zheng LL, Zhou KR, Liu S, et al: dreamBase: DNA modification, RNA regulation and protein binding of expressed pseudogenes in human health and disease. *Nucleic Acids Res* 46:D85-D91, 2018

- 1 21. Cooke SL, Shlien A, Marshall J, et al: Processed pseudogenes acquired  
2 somatically during cancer development. *Nat Commun* 5:3644, 2014
- 3 22. Shukla R, Upton KR, Munoz-Lopez M, et al: Endogenous retrotransposition  
4 activates oncogenic pathways in hepatocellular carcinoma. *Cell* 153:101-11, 2013
- 5 23. Chan JJ, Kwok ZH, Chew XH, et al: A FTH1 gene:pseudogene:microRNA  
6 network regulates tumorigenesis in prostate cancer. *Nucleic Acids Res* 46:1998-2011, 2018
- 7 24. Zang W, Wang T, Wang Y, et al: Knockdown of long non-coding RNA TP73-  
8 AS1 inhibits cell proliferation and induces apoptosis in esophageal squamous cell  
9 carcinoma. *Oncotarget* 7:19960-74, 2016
- 10 25. Wei Y, Chang Z, Wu C, et al: Identification of potential cancer-related  
11 pseudogenes in lung adenocarcinoma based on ceRNA hypothesis. *Oncotarget* 8:59036-  
12 59047, 2017
- 13 26. Milligan MJ, Lipovich L: Pseudogene-derived lncRNAs: emerging regulators of  
14 gene expression. *Front Genet* 5:476, 2014
- 15 27. Bateman A, Birney E, Durbin R, et al: The Pfam protein families database.  
16 *Nucleic Acids Res* 28:263-6, 2000
- 17 28. Finn RD, Mistry J, Schuster-Bockler B, et al: Pfam: clans, web tools and  
18 services. *Nucleic Acids Res* 34:D247-51, 2006
- 19 29. Chirag Jain SK: Fine-grained GPU parallelization of pairwise local sequence  
20 alignment. Presented at the 21st International Conference on High Performance Computing  
21 (HiPC, 2014)
- 22 30. Soroceanu L, Matlaf L, Khan S, et al: Cytomegalovirus Immediate-Early  
23 Proteins Promote Stemness Properties in Glioblastoma. *Cancer Res* 75:3065-76, 2015
- 24 31. Pei B, Sisu C, Frankish A, et al: The GENCODE pseudogene resource. *Genome*  
25 *Biology* 13:R51, 2012
- 26 32. Zhang Z, Carriero N, Zheng D, et al: PseudoPipe: an automated pseudogene  
27 identification pipeline. *Bioinformatics* 22:1437-1439, 2006
- 28 33. Lynch M, Conery JS: The evolutionary fate and consequences of duplicate  
29 genes. *Science* 290:1151-5, 2000
- 30 34. Baertsch R, Diekhans M, Kent WJ, et al: Retrocopy contributions to the  
31 evolution of the human genome. *BMC Genomics* 9:466, 2008
- 32 35. Zhang Y: PseudoFuN GitHub.  
33 [https://github.com/yanzhanglab/PseudoFuN\\_app](https://github.com/yanzhanglab/PseudoFuN_app), 2018
- 34 36. Johnson TS, Li S, Franz E, et al: PseudoFuN.  
35 [https://integrativeomics.shinyapps.io/pseudofun\\_app/](https://integrativeomics.shinyapps.io/pseudofun_app/), 2018
- 36 37. Grossman RL, Heath AP, Ferretti V, et al: Toward a Shared Vision for Cancer  
37 Genomic Data. *N Engl J Med* 375:1109-12, 2016
- 38 38. Carithers LJ, Moore HM: The Genotype-Tissue Expression (GTEx) Project.  
39 *Biopreserv Biobank* 13:307-8, 2015
- 40 39. Center OS: Ohio Supercomputer Center. Columbus OH, Ohio Supercomputer  
41 Center, 1987
- 42 40. Altschul SF, Gish W, Miller W, et al: Basic local alignment search tool. *J Mol*  
43 *Biol* 215:403-10, 1990
- 44 41. Zerbino DR, Achuthan P, Akanni W, et al: Ensembl 2018. *Nucleic Acids Res*  
45 46:D754-D761, 2018
- 46 42. Ensembl: Ensembl Biomart. [ensembl.org/biomart/martview](http://ensembl.org/biomart/martview), 2018

- 1  
2  
3  
4 1 43. Hagberg A, Swart P, S Chult D: Exploring network structure, dynamics, and  
5 2 function using NetworkX, Los Alamos National Lab.(LANL), Los Alamos, NM (United  
6 3 States), 2008  
7 4  
8 4 44. Harrow J, Frankish A, Gonzalez JM, et al: GENCODE: the reference human  
9 5 genome annotation for The ENCODE Project. *Genome Res* 22:1760-74, 2012  
10 6  
11 6 45. Echols N, Harrison P, Balasubramanian S, et al: Comprehensive analysis of  
12 7 amino acid and nucleotide composition in eukaryotic genomes, comparing genes and  
13 8 pseudogenes. *Nucleic Acids Res* 30:2515-23, 2002  
14 9  
15 9 46. Johnson TS, Li S, Kho JR, et al: Network analysis of pseudogene-gene  
16 10 relationships: from pseudogene evolution to their functional potentials. *Pac Symp*  
17 11 *Biocomput* 23:536-547, 2018  
18 12  
19 12 47. Karro JE, Yan Y, Zheng D, et al: Pseudogene.org: a comprehensive database  
20 13 and comparison platform for pseudogene annotation. *Nucleic Acids Res* 35:D55-60, 2007  
21 14  
22 14 48. pseudogenes.org: psiDr. [pseudogenes.org/psidr/similarity.dat](http://pseudogenes.org/psidr/similarity.dat)  
23 15  
24 15 49. pseudogenes.org: psiCube. <http://pseudogene.org/psicube/>  
25 16  
26 16 50. Ashburner M, Ball CA, Blake JA, et al: Gene Ontology: tool for the unification  
27 17 of biology. *Nature genetics* 25:25, 2000  
28 18  
29 18 51. Cancer Genome Atlas Research N, Weinstein JN, Collisson EA, et al: The  
30 19 Cancer Genome Atlas Pan-Cancer analysis project. *Nat Genet* 45:1113-20, 2013  
31 20  
32 20 52. Hudak D, Johnson D, Chalker A, et al: Open OnDemand: A web-based client  
33 21 portal for HPC centers.  
34 22  
35 22 53. Carmona U, Li L, Zhang L, et al: Ferritin light-chain subunits: key elements for  
36 23 the electron transfer across the protein cage. *Chem Commun (Camb)* 50:15358-61, 2014  
37 24  
38 24 54. Wu T, Li Y, Liu B, et al: Expression of Ferritin Light Chain (FTL) Is Elevated in  
39 25 Glioblastoma, and FTL Silencing Inhibits Glioblastoma Cell Proliferation via the  
40 26 GADD45/JNK Pathway. *PLoS ONE* 11:e0149361, 2016  
41 27  
42 27 55. Yang C, Wu D, Gao L, et al: Competing endogenous RNA networks in human  
43 28 cancer: hypothesis, validation, and perspectives. *Oncotarget* 7:13479-90, 2016  
44 29  
45 29 56. Cui SY, Wang R, Chen LB: MicroRNA-145: a potent tumour suppressor that  
46 30 regulates multiple cellular pathways. *J Cell Mol Med* 18:1913-26, 2014  
47 31  
48 31 57. Persano L, Moserle L, Esposito G, et al: Interferon-alpha counteracts the  
49 32 angiogenic switch and reduces tumor cell proliferation in a spontaneous model of prostatic  
50 33 cancer. *Carcinogenesis* 30:851-60, 2009  
51 34  
52 34 58. Welch JD, Baran-Gale J, Perou CM, et al: Pseudogenes transcribed in breast  
53 35 invasive carcinoma show subtype-specific expression and ceRNA potential. *BMC Genomics*  
54 36 16:113, 2015  
55 37  
56 37 59. Costa V, Esposito R, Aprile M, et al: Non-coding RNA and pseudogenes in  
57 38 neurodegenerative diseases: "The (un)Usual Suspects". *Front Genet* 3:231, 2012  
58 39  
59 39 60. Long MD, Singh PK, Russell JR, et al: The miR-96 and RARGamma signaling  
60 40 axis governs androgen signaling and prostate cancer progression. *Oncogene*, 2018  
61 41  
62 41 61. Xu J, Feng L, Han Z, et al: Extensive ceRNA-ceRNA interaction networks  
63 42 mediated by miRNAs regulate development in multiple rhesus tissues. *Nucleic Acids Res*  
64 43 44:9438-9451, 2016  
65 44  
66 44 62. Costa-Pinheiro P, Ramalho-Carvalho J, Vieira FQ, et al: MicroRNA-375 plays a  
67 45 dual role in prostate carcinogenesis. *Clin Epigenetics* 7:42, 2015

1  
2  
3  
4  
5  
6  
7  
8  
9  
10  
11  
12  
13  
14  
15  
16  
17  
18  
19  
20  
21  
22  
23  
24  
25  
26  
27  
28  
29  
30  
31  
32  
33  
34  
35  
36  
37  
38  
39  
40  
41  
42  
43  
44  
45  
46  
47  
48  
49  
50  
51  
52  
53  
54  
55  
56  
57  
58  
59  
60  
61  
62  
63  
64  
65

1           63.    Wang Y, Lieberman R, Pan J, et al: miR-375 induces docetaxel resistance in  
2 prostate cancer by targeting SEC23A and YAP1. Mol Cancer 15:70, 2016  
3           64.    MacKeigan JP, Murphy LO, Blenis J: Sensitized RNAi screen of human kinases  
4 and phosphatases identifies new regulators of apoptosis and chemoresistance. Nat Cell Biol  
5 7:591-600, 2005  
6           65.    F.R.S. RAF: Tests of significance in harmonic analysis. Proceedings of the  
7 Royal Society of London. Series A 125:54, 1929  
8           66.    Alexa A RJ: Gene set enrichment analysis with topGO.  
9 <http://www.bioconductor.org>, Bioconductor, 2009  
10          67.    Stelzer G, Rosen N, Plaschkes I, et al: The GeneCards Suite: From Gene Data  
11 Mining to Disease Genome Sequence Analyses. Curr Protoc Bioinformatics 54:1 30 1-1 30  
12 33, 2016  
13

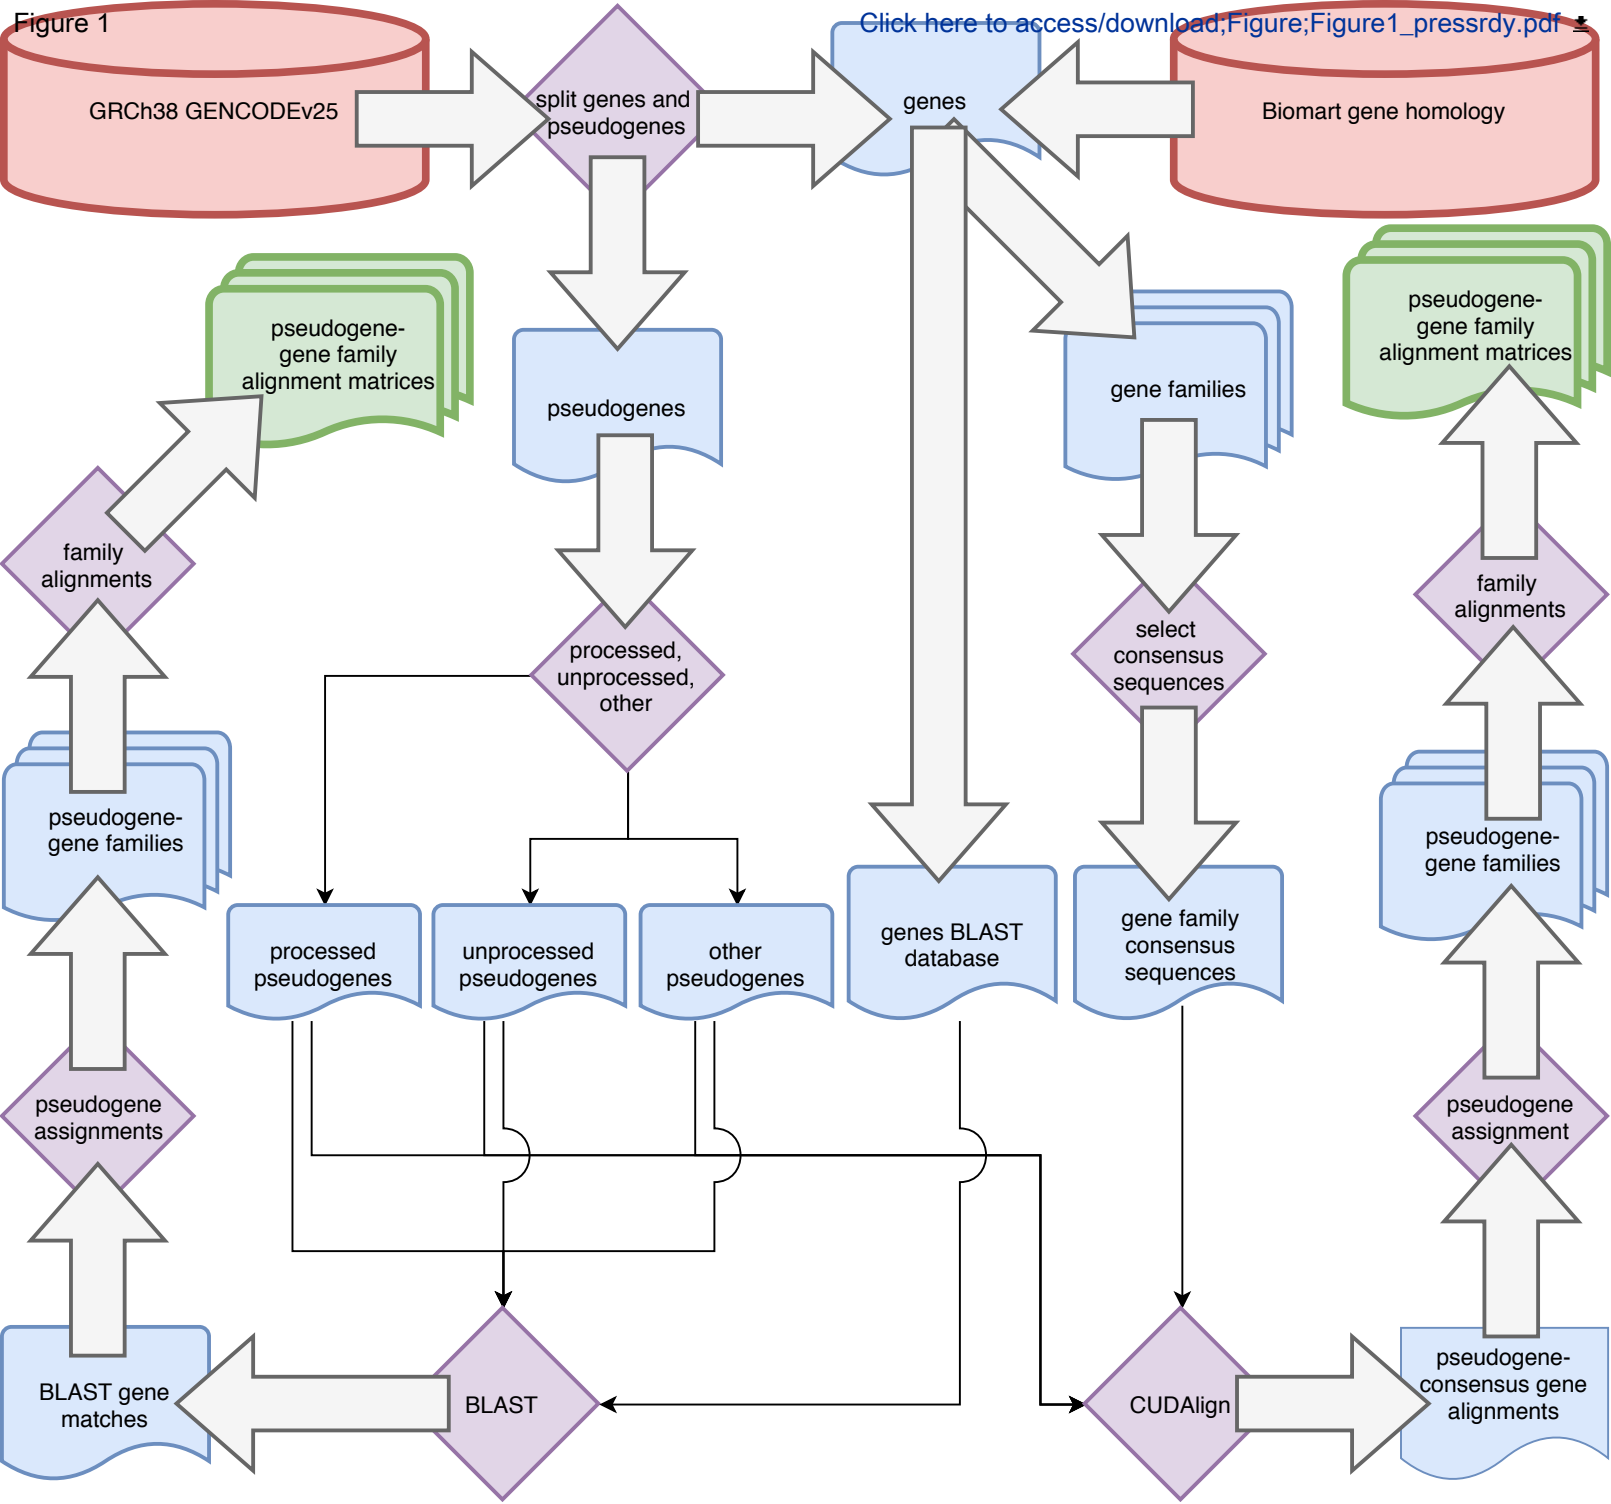

Figure 2

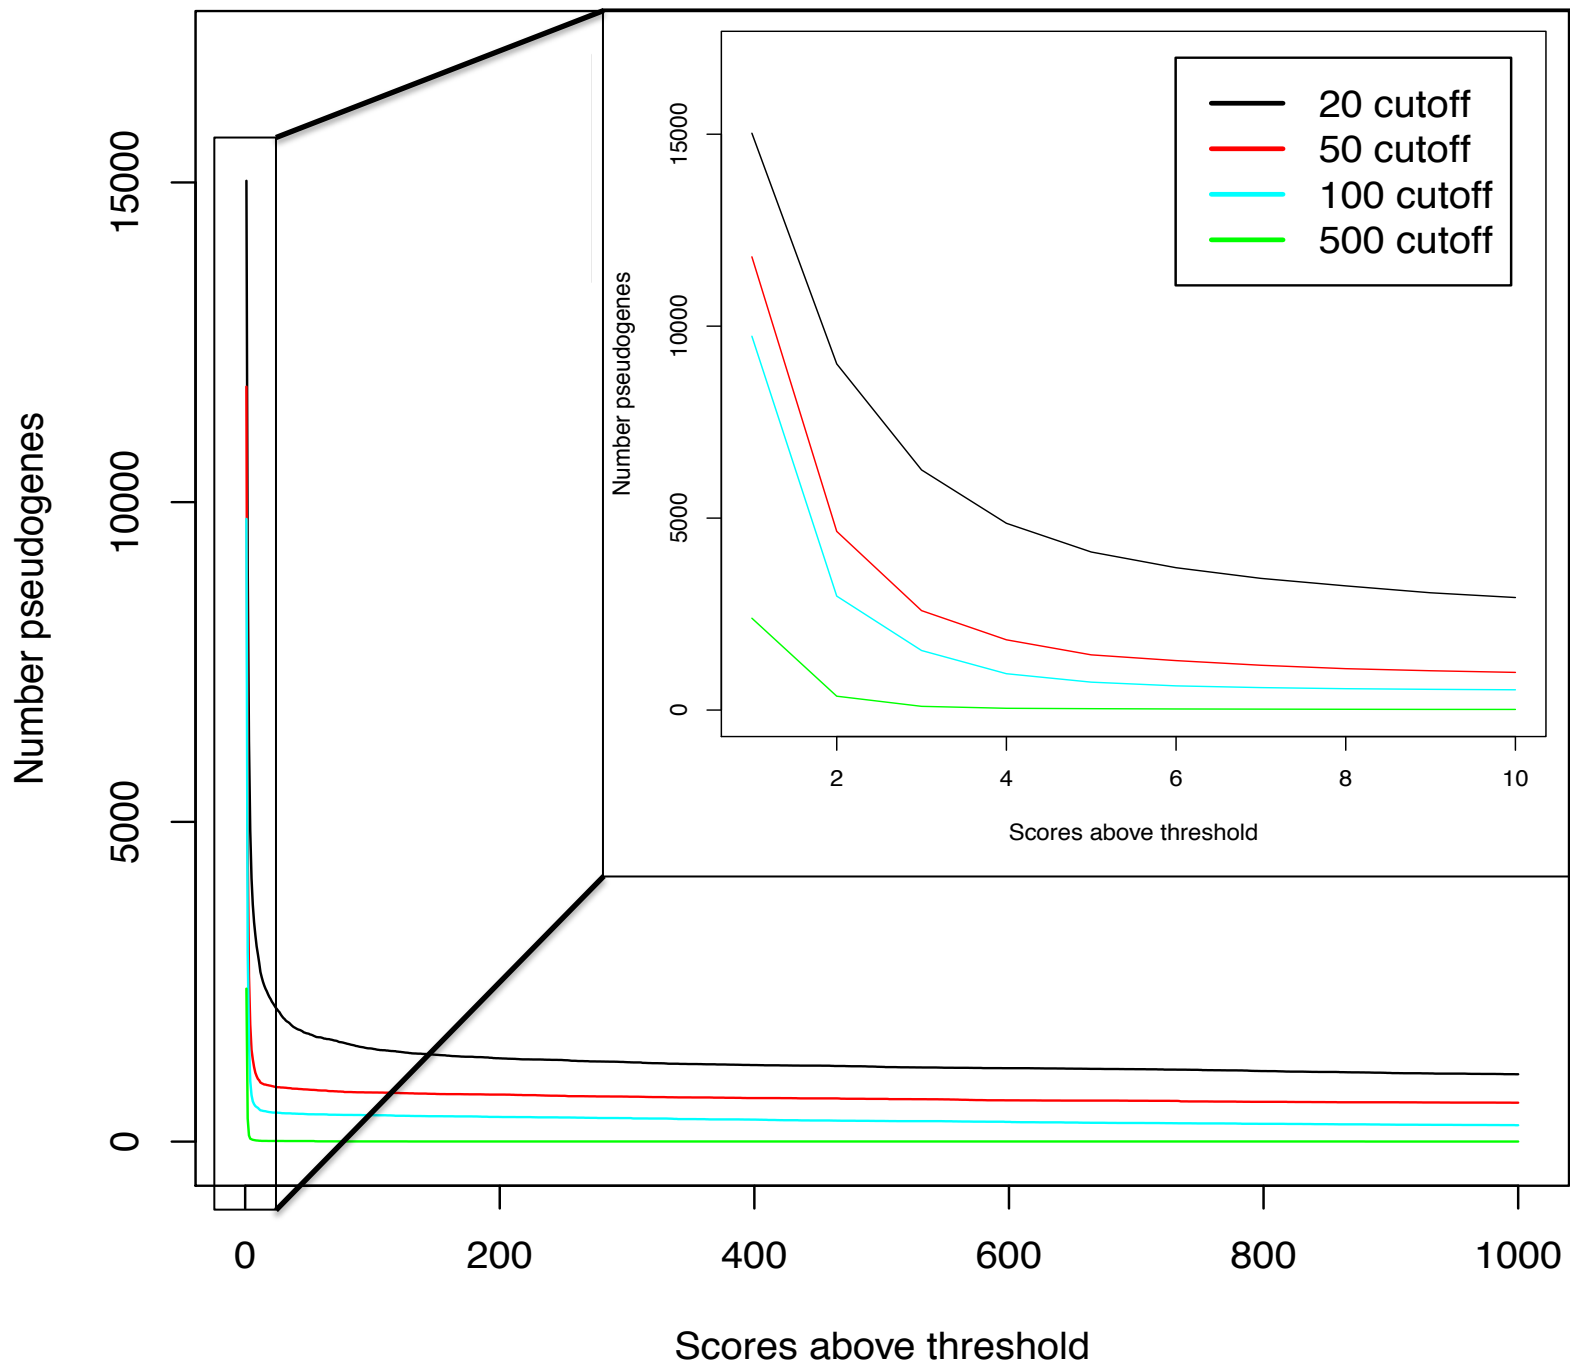

Figure 3

[Click here to access/download;Figure;Figure3\\_pressrdr.pdf](#)

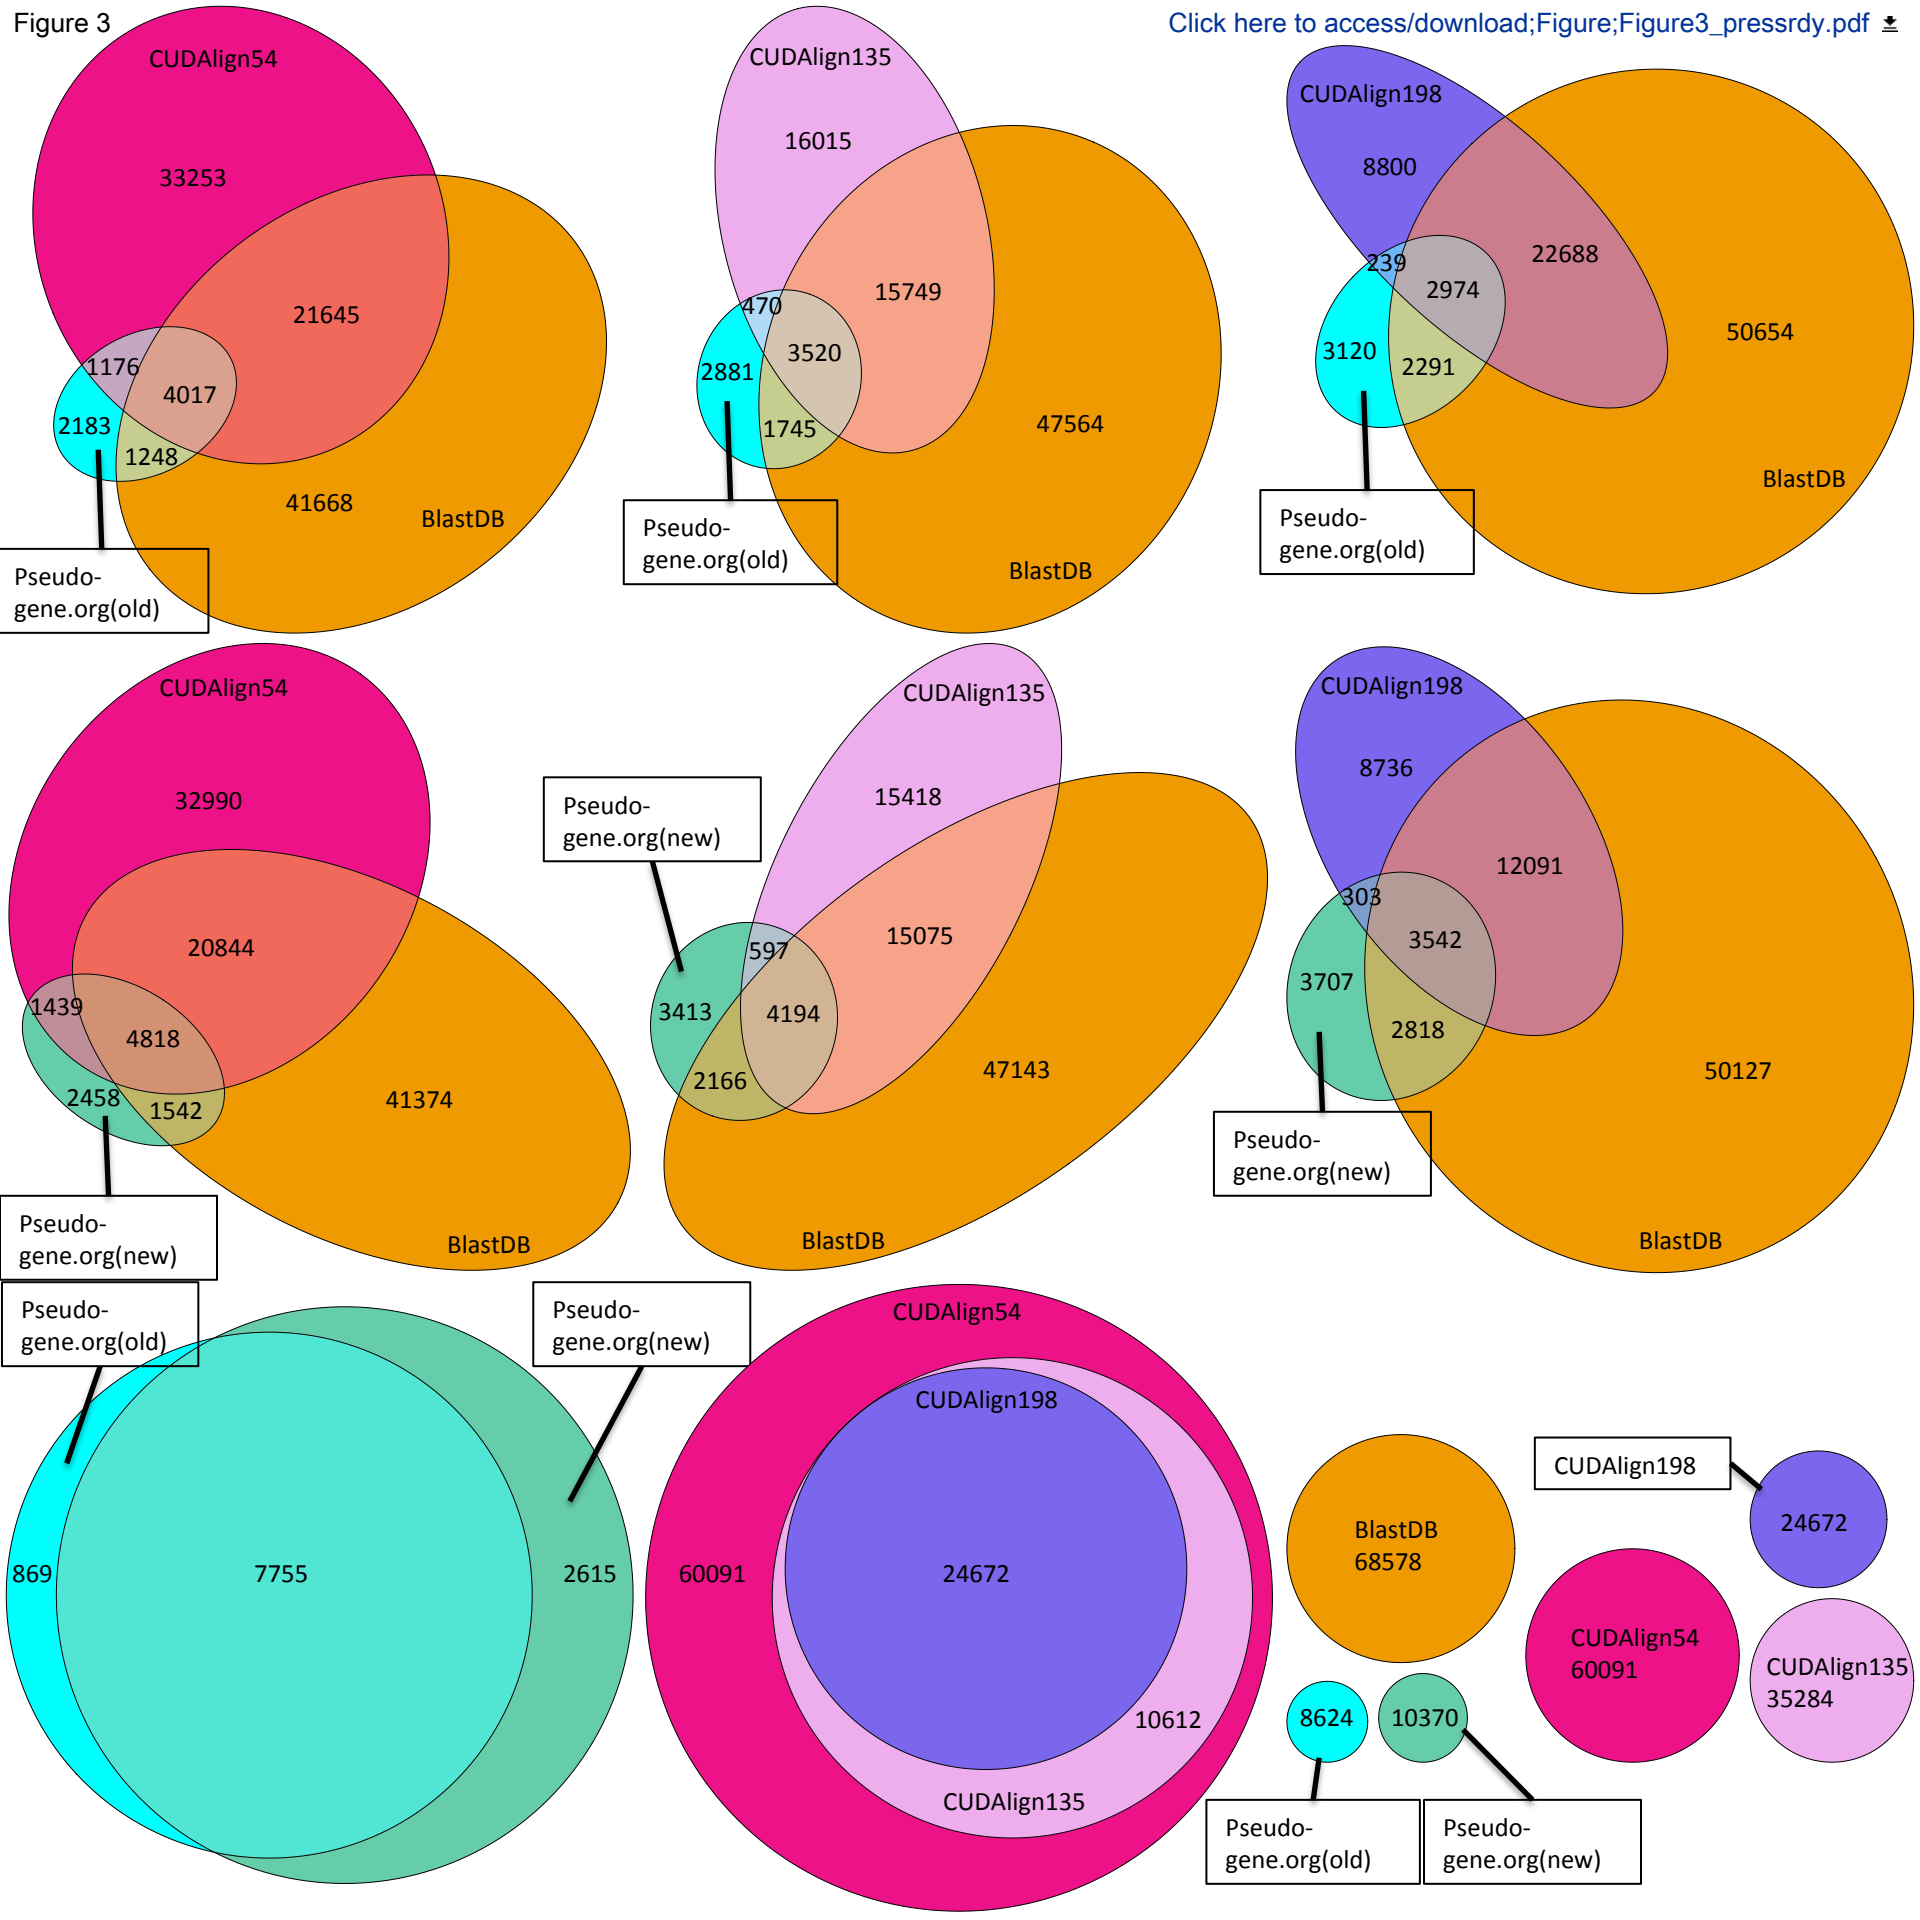



Figure 4

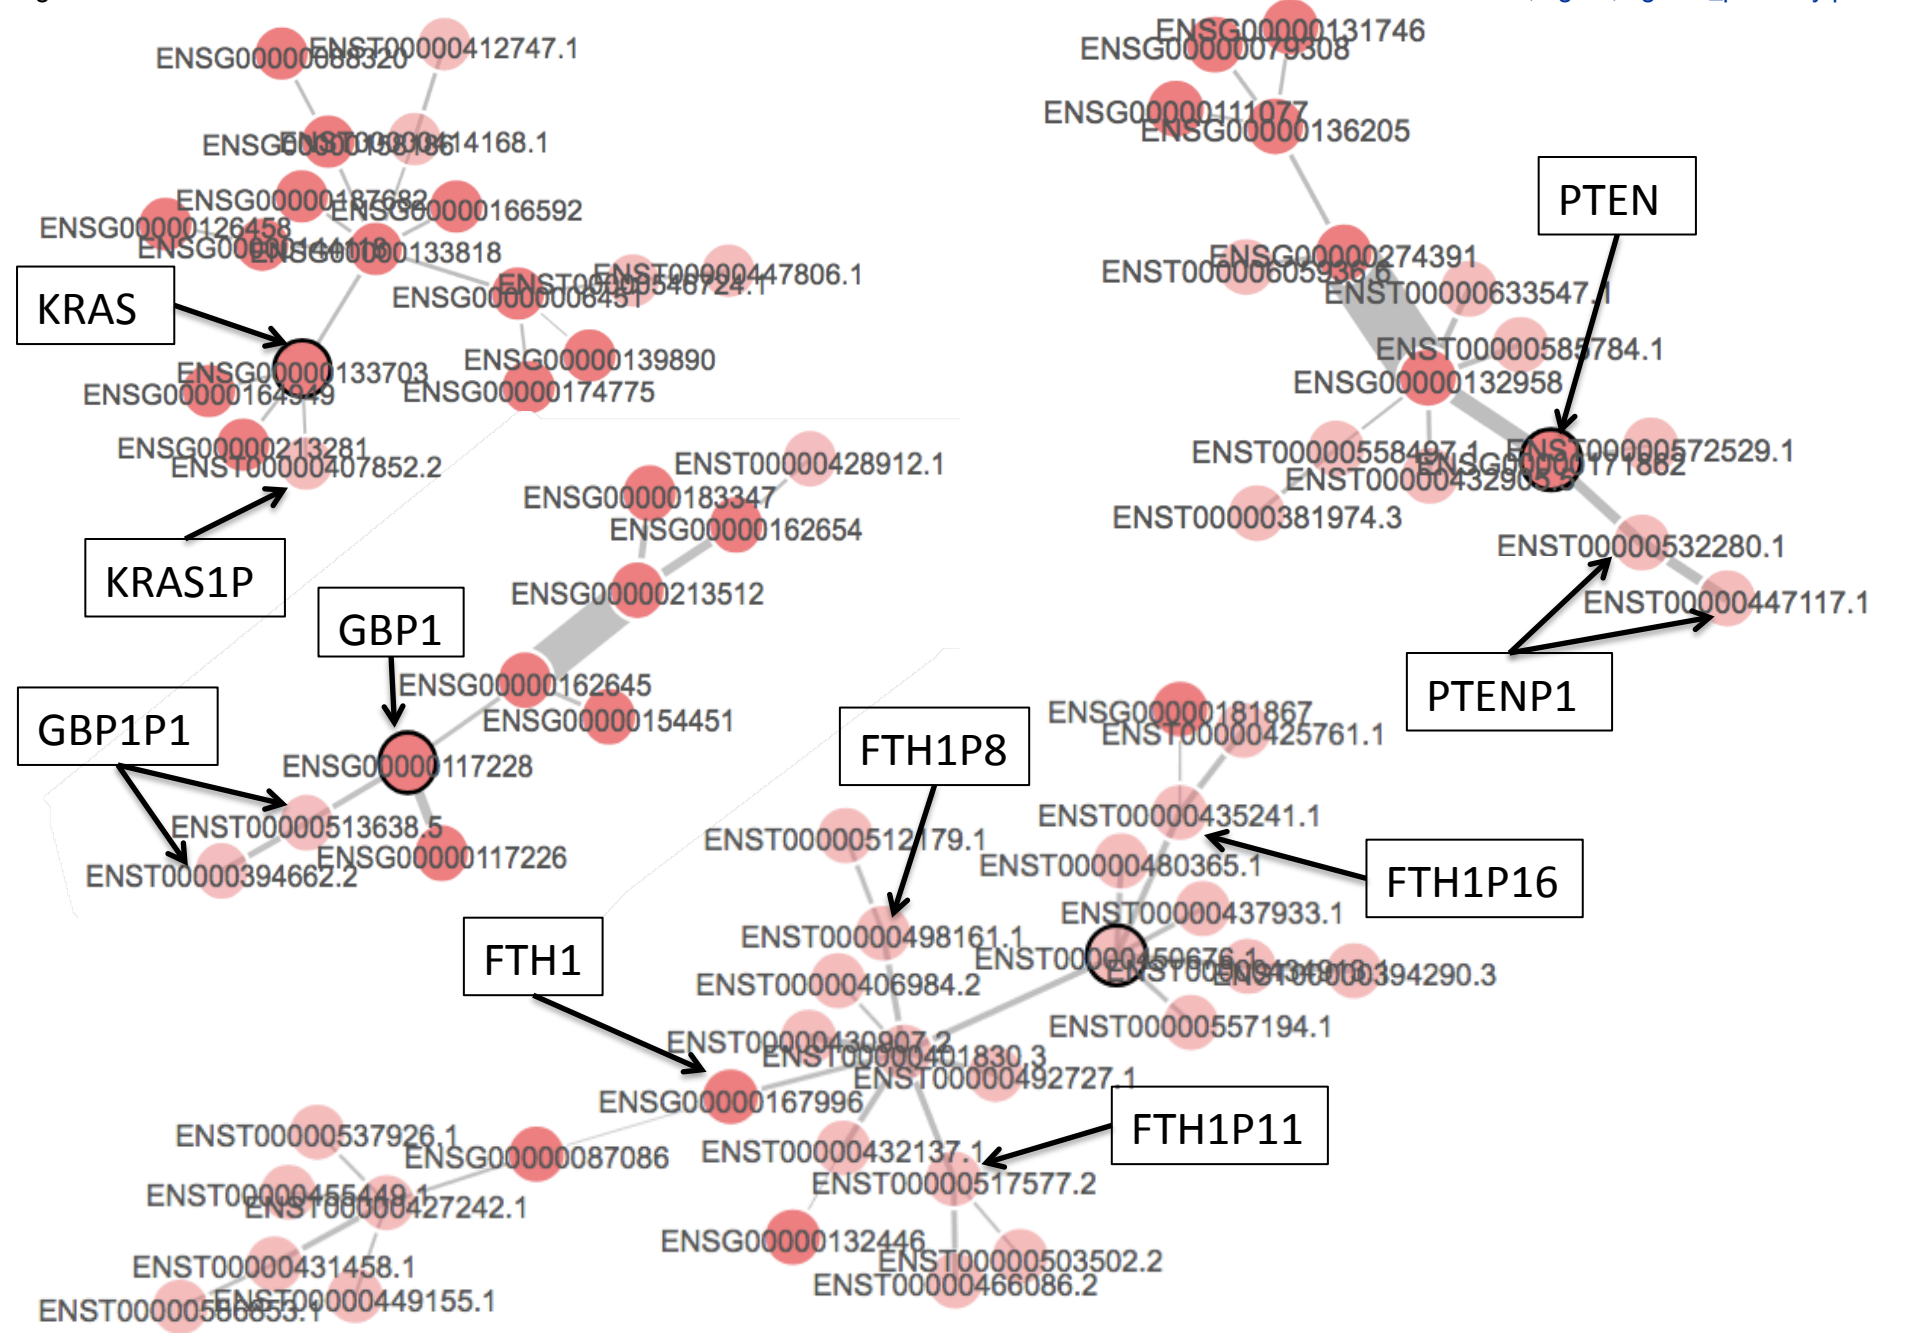



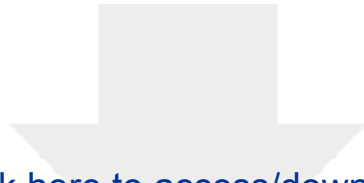

[Click here to access/download](#)

**Supplementary Material**

PseudoFuN\_suppl\_20180914\_v1.pdf

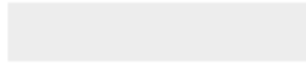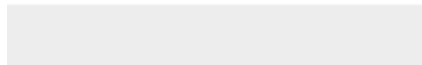

Sept 22, 2018

Dear Colleagues,

We are excited to present our new resource PseudoFuN ([https://integrativeomics.shinyapps.io/pseudofun\\_app/](https://integrativeomics.shinyapps.io/pseudofun_app/)) for consideration of publication in GigaScience. Here we submit the manuscript entitled "PseudoFuN: Deriving functional potentials of pseudogenes from integrative relationships with genes and miRNAs across 32 cancers".

In the past 1.5 years, we have been working on generating comprehensive pseudogene-gene (PGG) family databases. Unlike previous pseudogene-gene databases which conventionally only considered the 1:1 pseudogene-parent gene pairs, we considered all the homologous genes and pseudogenes as a PGG family. We believe PGG families are more comprehensive in modeling evolutionary relationship and functional relationships of pseudogenes and genes.

These PGG families can be used as input to study gene-pseudogene-miRNA co-expression indicative of ceRNA networks (e.g., across the entire Cancer Genome Atlas), individually downloaded with pairwise sequence homology, mapped to functional annotation, and mapped back to the genomic location. With these databases and tools provided by PseudoFuN, it is possible to generate hypotheses regarding i) the regulatory roles of pseudogenes across tumor and normal tissue, ii) pseudogene gene relationships through our de novo reassignment of pseudogenes to gene families and iii) functional annotation of pseudogenes. We expect our databases and tools to have more applications in cancer studies.

Best,  
Yan

--

Yan Zhang, Ph.D.  
Assistant Professor  
Department of Biomedical Informatics  
College of Medicine  
The Ohio State University  
310-B Lincoln Tower, 1800 Cannon Drive, Columbus, OH 43210  
Phone: (614) 688-9643 | Email: [Yan.Zhang@osumc.edu](mailto:Yan.Zhang@osumc.edu)  
[https://medicine.osu.edu/bmi/people/yan\\_zhang/Pages/index.aspx](https://medicine.osu.edu/bmi/people/yan_zhang/Pages/index.aspx)
